# Supplementary material for: Immunogenicity and Safety of Reduced-Dose Intradermal vs Intramuscular Influenza Vaccines: A Systematic Review and Meta-analysis
Source: PubMed Central journal article supplement (PMC7873776; doi:10.1001/jamanetworkopen.2020.35693), 2021-02-09

## Supplemental Online Content

Egunsola O, Clement F, Taplin J, et al. Immunogenicity and safety of reduced-dose intradermal vs intramuscular influenza vaccines: a systematic review and meta-analysis. *JAMA Netw Open*. 2021;4(2):e2035693. doi:10.1001/jamanetworkopen.2020.35693

### **eAppendix.** Search Strategy

**eFigure 1.** Quality Assessment of Randomized Clinical Trials

**eFigure 2.** Seroconversion: 3 µg ID vs 15 µg IM

**eFigure 3.** Seroconversion: 6 µg ID vs 15 µg IM

**eFigure 4.** Seroconversion: 7.5 µg ID vs 15 µg IM

**eFigure 5.** Seroconversion: 9 µg ID vs 15 µg IM in All Population

**eFigure 6.** Seroconversion: in Older Adults 9 µg ID vs 15 µg IM

**eFigure 7.** Seroconversion: 15 µg ID vs 15 µg IM

**eFigure 8.** Seroconversion: in Older Adults 15 µg ID vs 15 µg IM

**eFigure 9.** Seroprotection: 3 µg ID vs 15 µg IM

**eFigure 10.** Seroprotection: 6 µg ID vs 15 µg IM

**eFigure 11.** Seroprotection: 7.5 µg ID vs 15 µg IM

**eFigure 12.** Seroprotection: 9 µg ID vs 15 µg IM

**eFigure 13.** Seroprotection Older Adults: 9 µg ID vs 15 µg IM

**eFigure 14.** Seroprotection: 15 µg ID vs 15 µg IM

**eFigure 15.** Seroprotection in Older Adults: 15 µg ID vs 15 µg IM

**eFigure 16.** GMT: 3 µg ID vs 15 µg IM

**eFigure 17.** GMT: 6 µg ID vs 15 µg IM

**eFigure 18.** GMT: 9 µg ID vs 15 µg IM

**eFigure 19.** GMT: in Older Adults 9 µg ID vs 15 µg IM

**eFigure 20.** GMT: 15 µg ID vs 15 µg IM

**eFigure 21.** GMT in Older Adults: 15 µg ID vs 15 µg IM

**eFigure 22.** Local Adverse Events: 3 µg ID vs 15 µg IM

**eFigure 23.** Local Adverse Events: 6 µg ID vs 15 µg IM

**eFigure 24.** Local Adverse Events: 9 µg ID vs 15 µg IM

**eFigure 25.** Local Adverse Events: 15 µg ID vs 15 µg IM

**eFigure 26.** Systemic Adverse Events: 3 µg ID vs 15 µg IM

**eFigure 27.** Systemic Adverse Events: 6 µg ID vs 15 µg IM

**eFigure 28.** Systemic Adverse Events: 9 µg ID vs 15 µg IM

**eFigure 29.** Systemic Adverse Events: 15 µg ID vs 15 µg IM

**eFigure 30.** Funnel Plot of Seroconversion: 9 µg ID vs 15 µg IM

**eFigure 31.** Funnel Plot of Seroprotection: 9 µg vs 15 µg

**eFigure 32.** Funnel Plot of GMT: 9 µg ID vs 15 µg IM

**eFigure 33.** Funnel Plot of Seroconversion: 15 µg ID vs 15 µg IM

**eFigure 34.** Funnel Plot of Seroprotection: 15 µg ID vs 15 µg IM

**eFigure 35.** Funnel Plot of GMT: 15 µg ID vs 15 µg IM

This supplemental material has been provided by the authors to give readers additional information about their work.

## **eAppendix. Search Strategy**

---

### **MEDLINE**

1. Influenza, Human/
2. exp influenzavirus a/ or exp influenzavirus b/ or influenzavirus c/
3. Influenza Vaccines/
4. (influenza\* or flu).tw,kf.
5. 1 or 2 or 3 or 4
6. Injections, Intradermal/
7. (intradermal or intra-dermal).tw,kf.
8. ID injection\*.tw,kf.
9. IDflu.tw,kf.
10. (inject\* adj5 (dermal or dermis)).tw,kf.
11. mantoux.tw,kf.
12. dose sparing.tw,kf.
13. 6 or 7 or 8 or 9 or 10 or 11 or 12
14. 5 and 13
15. animals/ not humans/
16. 14 not 15
17. limit 16 to (case reports or editorial or letter)
18. 16 not 17
19. limit 18 to yr="2010 -Current"

### **EMBASE**

1. influenza/ or exp influenza a/ or influenza b/ or influenza c/ or seasonal influenza/
2. influenza virus/ or exp influenzavirus a/ or exp influenzavirus b/ or exp influenzavirus c/

3. influenza vaccine/
4. (influenza\* or flu).tw,kw.
5. 1 or 2 or 3 or 4
6. intradermal drug administration/
7. (intradermal or intra-dermal).tw,kw.
8. ID injection\*.tw,kw.
9. IDflu.tw,kw.
10. (inject\* adj5 (dermal or dermis)).tw,kw.
11. mantoux.tw,kw.
12. dose sparing.tw,kw.
13. 6 or 7 or 8 or 9 or 10 or 11 or 12
14. 5 and 13
15. exp influenza vaccine/dl [Intradermal Drug Administration]
16. 14 or 15
17. animals/ not human/
18. 16 not 17
19. limit 18 to (conference abstract or editorial or letter)
20. 18 not 19
21. limit 20 to yr="2010 -Current"

### **Cochrane Central Register of Controlled Trials**

1. Influenza, Human/
2. exp influenzavirus a/ or exp influenzavirus b/ or influenzavirus c/
3. Influenza Vaccines/
4. (influenza\* or flu).tw.

5. 1 or 2 or 3 or 4
6. Injections, Intradermal/
7. (intradermal or intra-dermal).tw.
8. ID injection\*.tw.
9. IDflu.tw.
10. (inject\* adj5 (dermal or dermis)).tw.
11. mantoux.tw.
12. dose sparing.tw.
13. 6 or 7 or 8 or 9 or 10 or 11 or 12
14. 5 and 13
15. animals/ not humans/
16. 14 not 15

**eFigure 1. Quality Assessment of Randomized Clinical Trials**

| Author (Year)                           | Domain 1       | Domain 2       | Domain 3       | Domain 4       | Domain 5     | Overall Bias |
|-----------------------------------------|----------------|----------------|----------------|----------------|--------------|--------------|
| Ansaldi et al.<br>(2013) <sup>18</sup>  | Some Concern   | Some Concern   | Low<br>Concern | Low<br>Concern | Some Concern | Some Concern |
| Ansaldi et al.<br>(2012) <sup>17</sup>  | Some Concern   | Some Concern   | Low<br>Concern | Low<br>Concern | Some Concern | Some Concern |
| Arnou et al.<br>(2010) <sup>19</sup>    | Low<br>Concern | Some Concern   | Low<br>Concern | Low<br>Concern | Some Concern | Some Concern |
| Boonak et al.<br>(2017) <sup>20</sup>   | Some Concern   | Some Concern   | Low<br>Concern | Low<br>Concern | Some Concern | Some Concern |
| Camiloni et al.<br>(2014) <sup>21</sup> | Some Concern   | Some Concern   | Low<br>Concern | Low<br>Concern | Some Concern | Some Concern |
| Carter et al.<br>(2019) <sup>22</sup>   | Low<br>Concern | Low<br>Concern | Low<br>Concern | Low<br>Concern | Some Concern | Some Concern |
| Chan et al.<br>(2014) <sup>23</sup>     | Low<br>Concern | Some Concern   | Low<br>Concern | Low<br>Concern | Some Concern | Some Concern |
| Chi et al.<br>(2010) <sup>24</sup>      | Some Concern   | Some Concern   | Low<br>Concern | Low<br>Concern | Some Concern | Some Concern |
| Chuaychoo et al.                        | Some Concern   | Some Concern   | Low            | Low            | Some Concern | Some Concern |

| Author (Year)                               | Domain 1        | Domain 2       | Domain 3       | Domain 4        | Domain 5     | Overall Bias    |
|---------------------------------------------|-----------------|----------------|----------------|-----------------|--------------|-----------------|
| (2019) <sup>25</sup>                        |                 |                | Concern        | Concern         |              |                 |
| Chuaychoo et al.<br>(2016) <sup>26</sup>    | Some Concern    | Some Concern   | Low<br>Concern | Low<br>Concern  | Some Concern | Some Concern    |
| Chuaychoo et al.<br>(2010) <sup>27</sup>    | High<br>Concern | Some Concern   | Low<br>Concern | Low<br>Concern  | Some Concern | High<br>Concern |
| Della Cioppa et al.<br>(2014) <sup>28</sup> | Some Concern    | Some Concern   | Low<br>Concern | Low<br>Concern  | Some Concern | Some Concern    |
| Esposito et al.<br>(2011) <sup>29</sup>     | Low<br>Concern  | Some Concern   | Low<br>Concern | Low<br>Concern  | Some Concern | Some Concern    |
| Frenck et al.<br>(2011) <sup>30</sup>       | Some Concern    | Some Concern   | Low<br>Concern | Low<br>Concern  | Some Concern | Some Concern    |
| Garg et al.<br>(2016) <sup>31</sup>         | Low<br>Concern  | Some Concern   | Low<br>Concern | Low<br>Concern  | Some Concern | Some Concern    |
| Gorse et al.<br>(2013) <sup>32</sup>        | Some Concern    | Some Concern   | Low<br>Concern | Low<br>Concern  | Some Concern | Some Concern    |
| Han et al.<br>(2013) <sup>33</sup>          | High<br>Concern | Some Concern   | Low<br>Concern | High<br>Concern | Some Concern | High<br>Concern |
| Hung et al.<br>(2016) <sup>34</sup>         | Low<br>Concern  | Low<br>Concern | Low<br>Concern | Low<br>Concern  | Some Concern | Some Concern    |

| Author (Year)                          | Domain 1     | Domain 2     | Domain 3       | Domain 4       | Domain 5     | Overall Bias |
|----------------------------------------|--------------|--------------|----------------|----------------|--------------|--------------|
| Hung et al.<br>(2014) <sup>36</sup>    | Some Concern | Some Concern | Low<br>Concern | Low<br>Concern | Some Concern | Some Concern |
| Hung et al.<br>(2012) <sup>35</sup>    | Some Concern | Some Concern | Low<br>Concern | Low<br>Concern | Some Concern | Some Concern |
| Leung et al.<br>(2017) <sup>37</sup>   | Some Concern | Some Concern | Low<br>Concern | Low<br>Concern | Some Concern | Some Concern |
| Levin et al.<br>(2016) <sup>45</sup>   | Some Concern | Some Concern | Low<br>Concern | Low<br>Concern | Some Concern | Some Concern |
| Levin et al.<br>(2014) <sup>44</sup>   | Some Concern | Some Concern | Low<br>Concern | Low<br>Concern | Some Concern | Some Concern |
| Nougaredet al.<br>(2014) <sup>38</sup> | Some Concern | Some Concern | Low<br>Concern | Low<br>Concern | Some Concern | Some Concern |
| Patel et al.<br>(2010) <sup>39</sup>   | Some Concern | Some Concern | Low<br>Concern | Low<br>Concern | Some Concern | Some Concern |
| Seo et al.<br>(2014) <sup>40</sup>     | Some Concern | Some Concern | Low<br>Concern | Low<br>Concern | Some Concern | Some Concern |
| Song et al.<br>(2013) <sup>41</sup>    | Some Concern | Some Concern | Low<br>Concern | Low<br>Concern | Some Concern | Some Concern |
| Tsang et al.                           | Some Concern | Some Concern | Low            | Low            | Some Concern | Some Concern |

| Author (Year)                            | Domain 1     | Domain 2     | Domain 3       | Domain 4       | Domain 5     | Overall Bias |
|------------------------------------------|--------------|--------------|----------------|----------------|--------------|--------------|
| (2014) <sup>42</sup>                     |              |              | Concern        | Concern        |              |              |
| Van Damme et al.<br>(2010) <sup>43</sup> | Some Concern | Some Concern | Low<br>Concern | Low<br>Concern | Some Concern | Some Concern |



**eFigure 2. Seroconversion: 3 µg ID vs 15 µg IM**

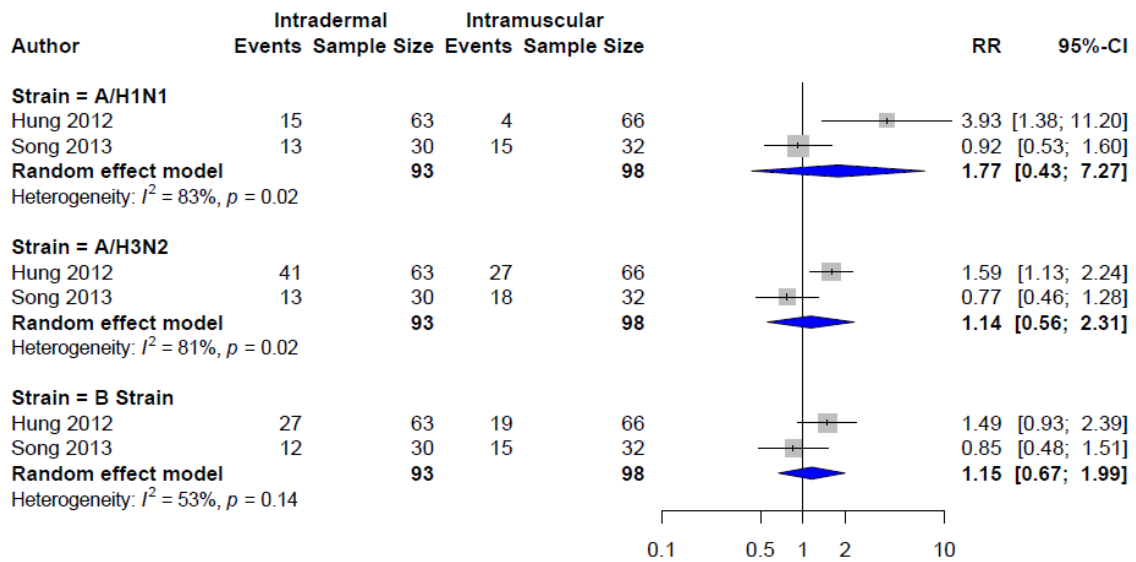

**eFigure 3. Seroconversion: 6 µg ID vs 15 µg IM**

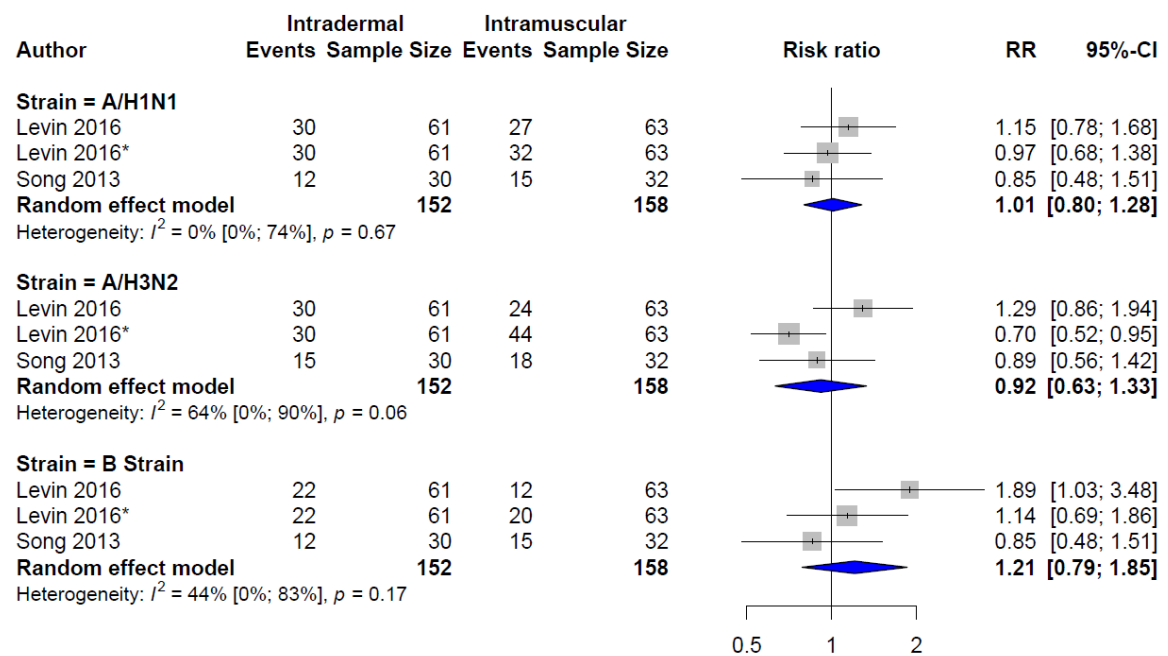

**eFigure 4.** Seroconversion: 7.5 µg ID vs 15 µg IM

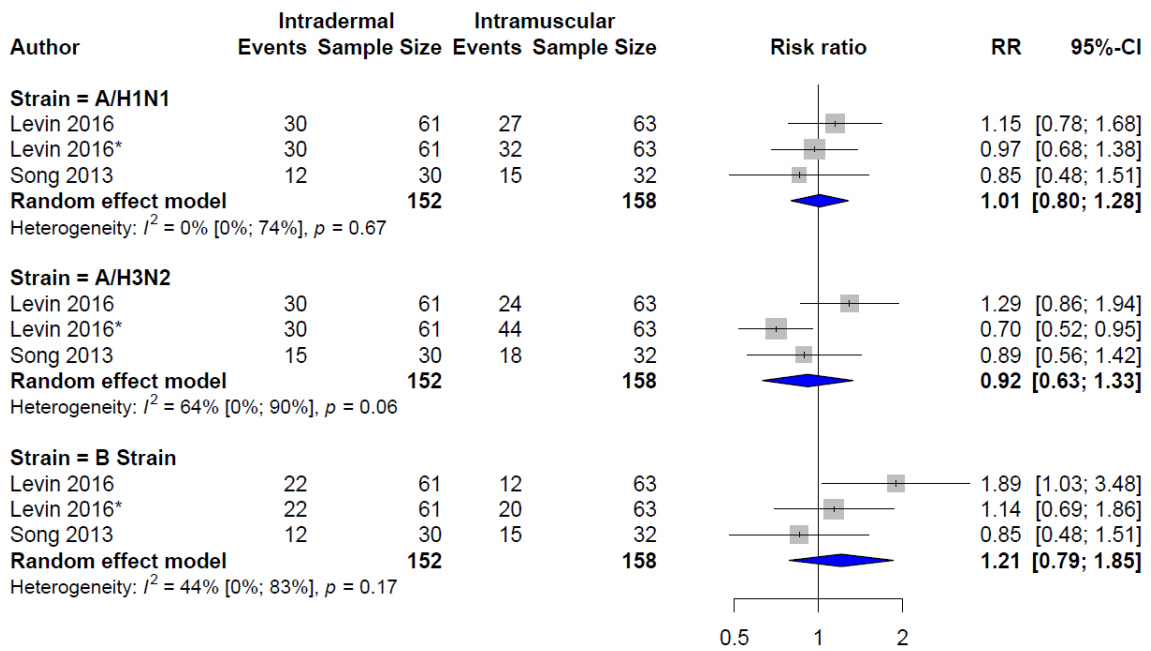

**eFigure 5.** Seroconversion: 9 µg ID vs 15 µg IM in All Population  
 † Soluvia Microneedle

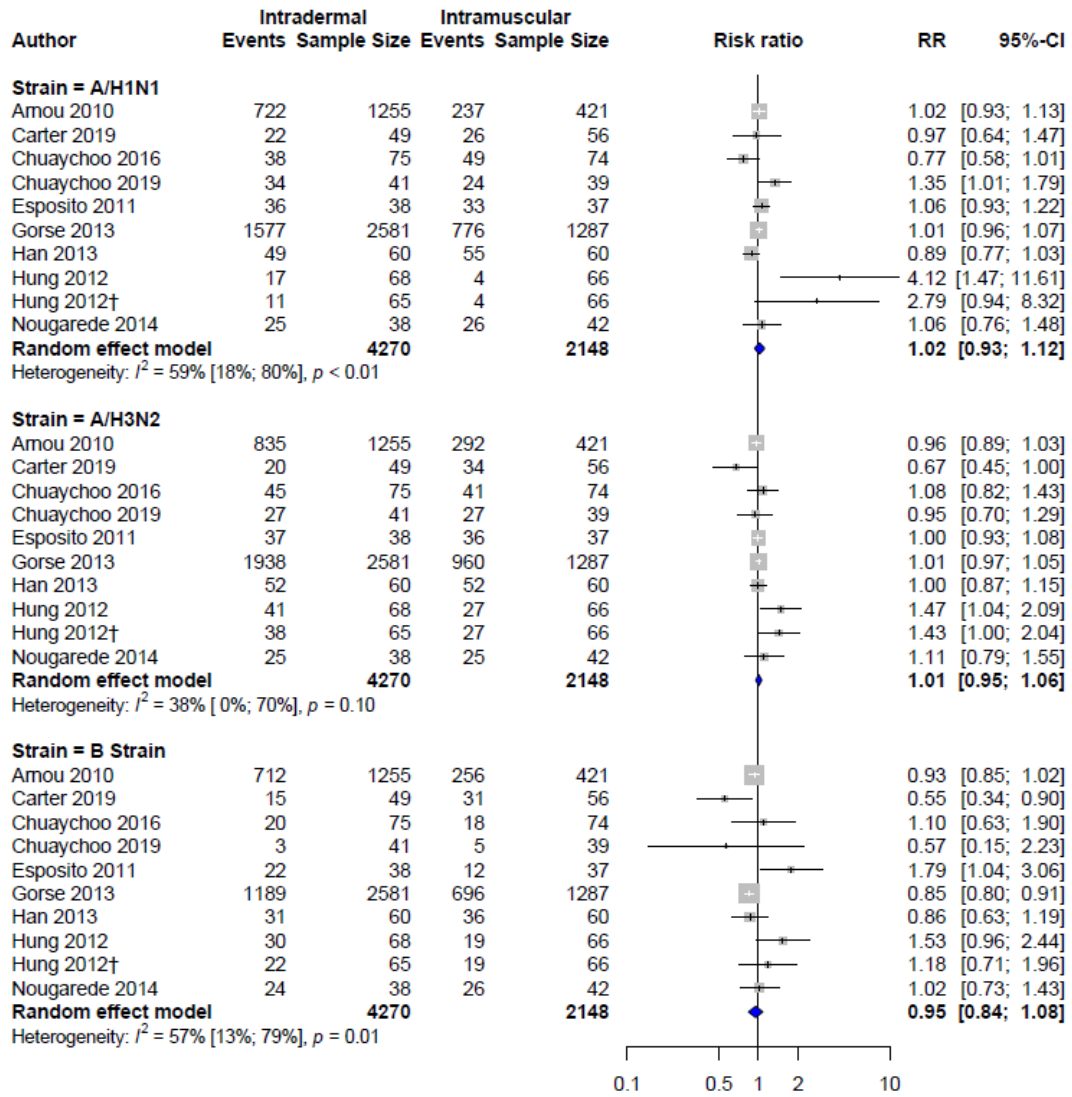

**eFigure 6.** Seroconversion: in Older Adults 9 µg ID vs 15 µg IM

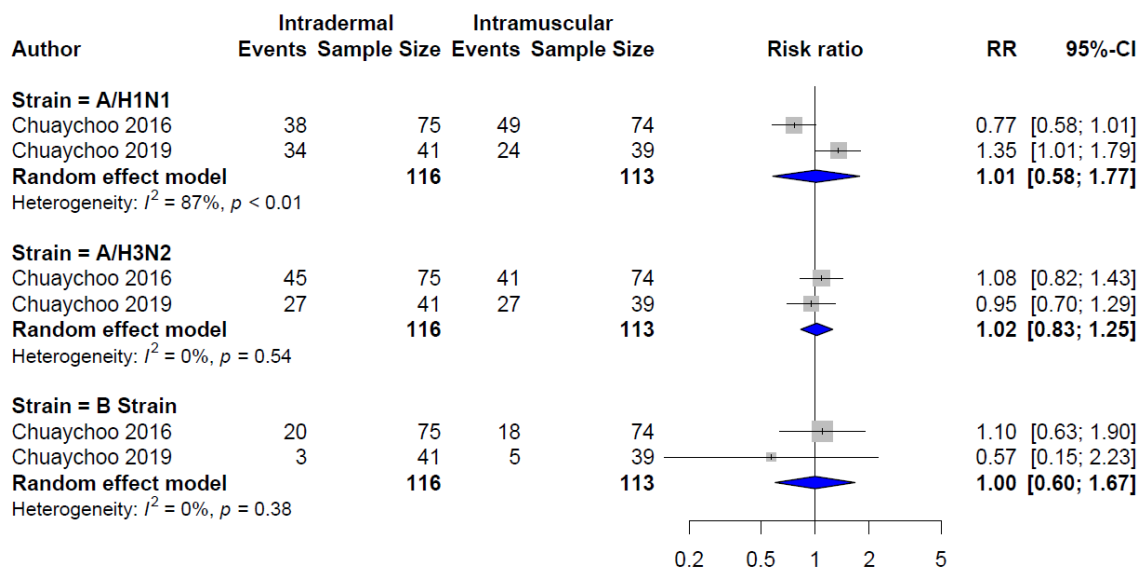

**eFigure 7.** Seroconversion: 15 µg ID vs 15 µg IM  
 (\*Inflexa vs Inflexa, \*\* Intanza vs Inflexa, †Inflexa vs Fluad, ‡Intanza vs Fluad, † Adjuvanted)

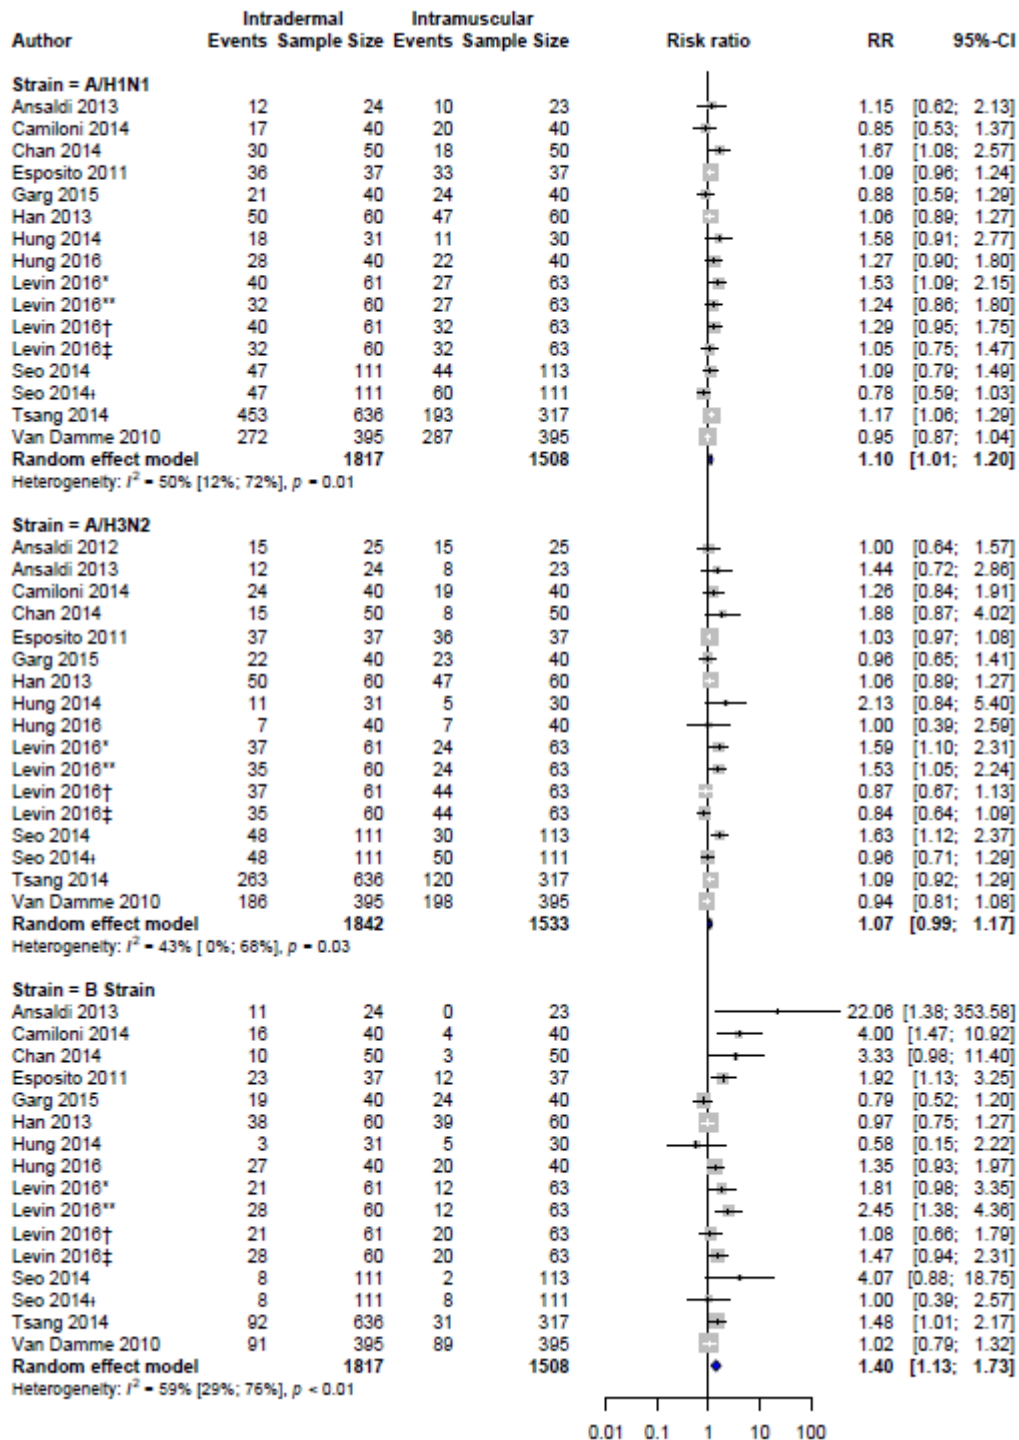

**eFigure 8.** Seroconversion: in Older Adults 15 µg ID vs 15 µg IM  
 (\*Inflexa vs Inflexa, \*\* Intanza vs Inflexa, †Inflexa vs Fluad, ‡Intanza vs Fluad, † Adjuvanted)

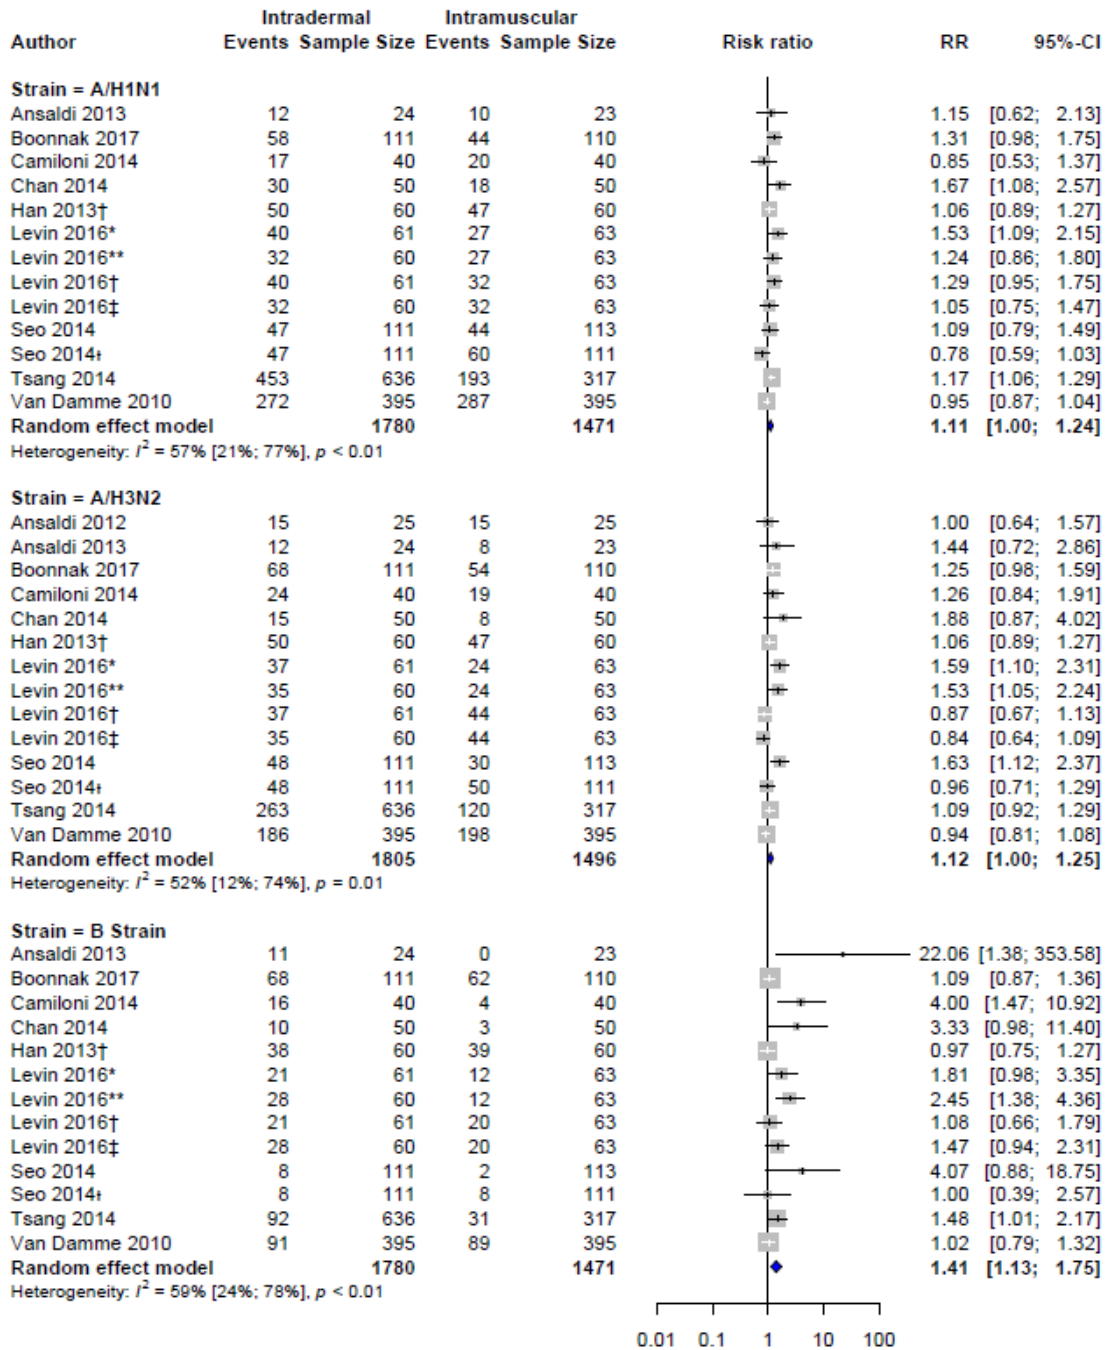

**eFigure 9. Seroprotection: 3 µg ID vs 15 µg IM**

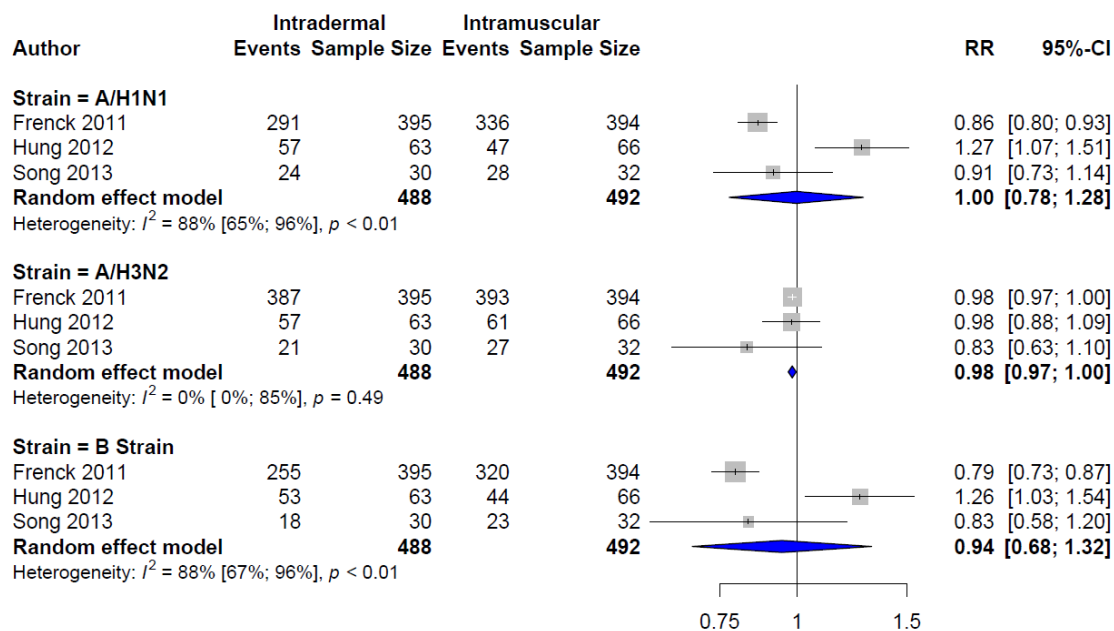

**eFigure 10. Seroprotection: 6 µg ID vs 15 µg IM**

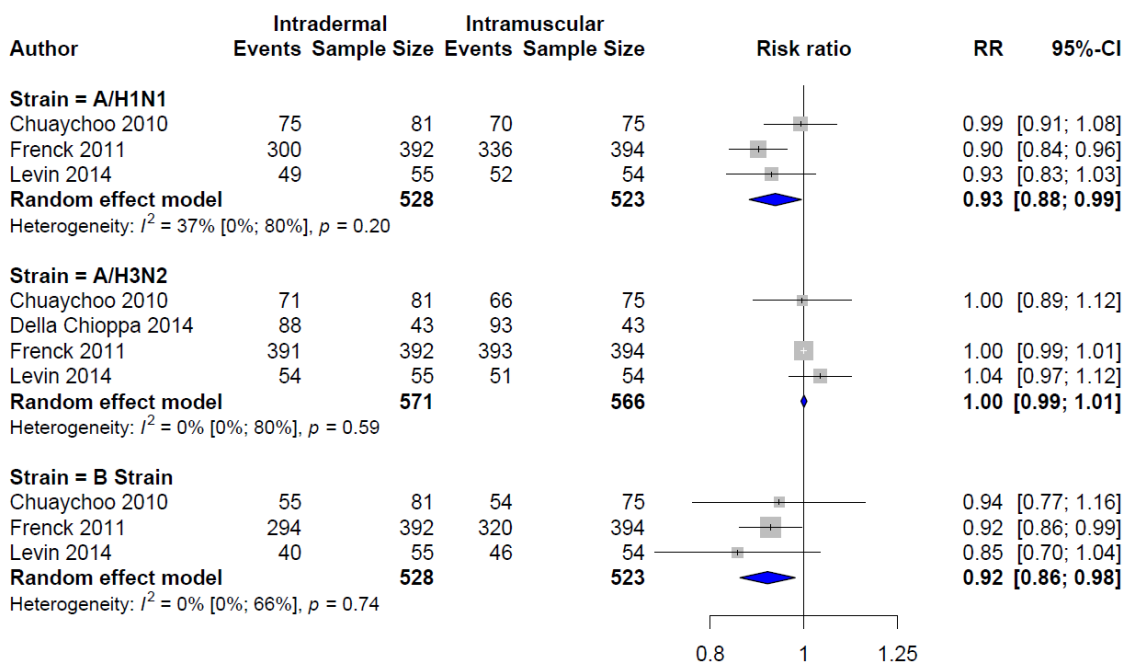

**eFigure 11. Seroprotection: 7.5 µg ID vs 15 µg IM**

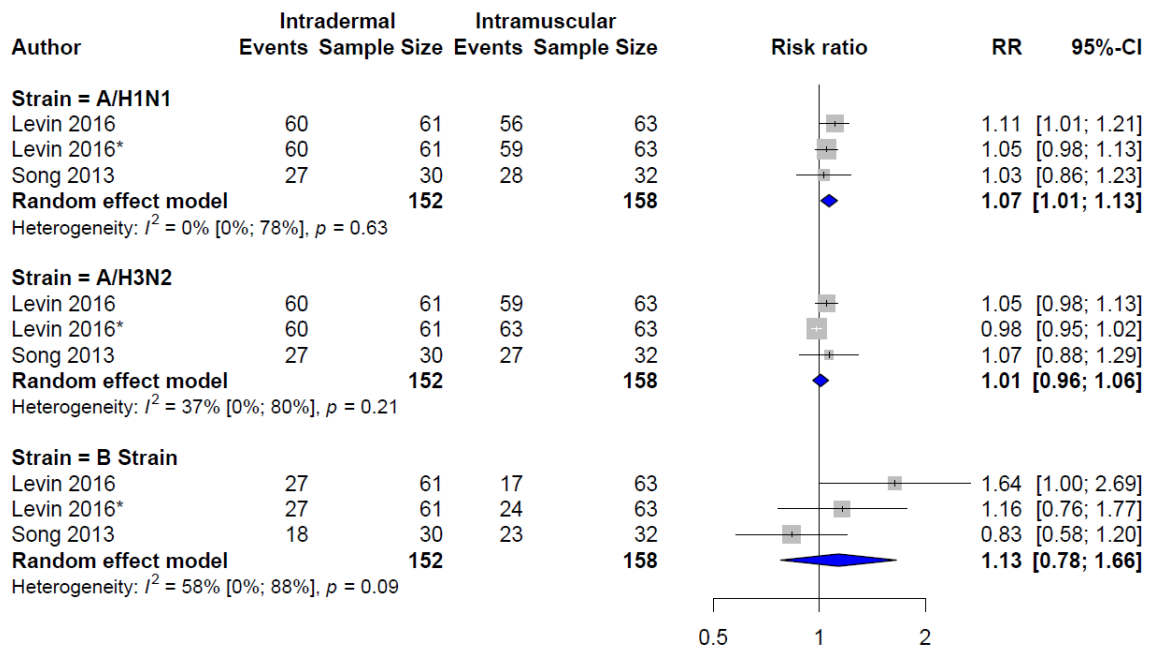



**eFigure 12.** Seroprotection: 9 µg ID vs 15 µg IM († Soluvia Microneedle, \* Two Injections)

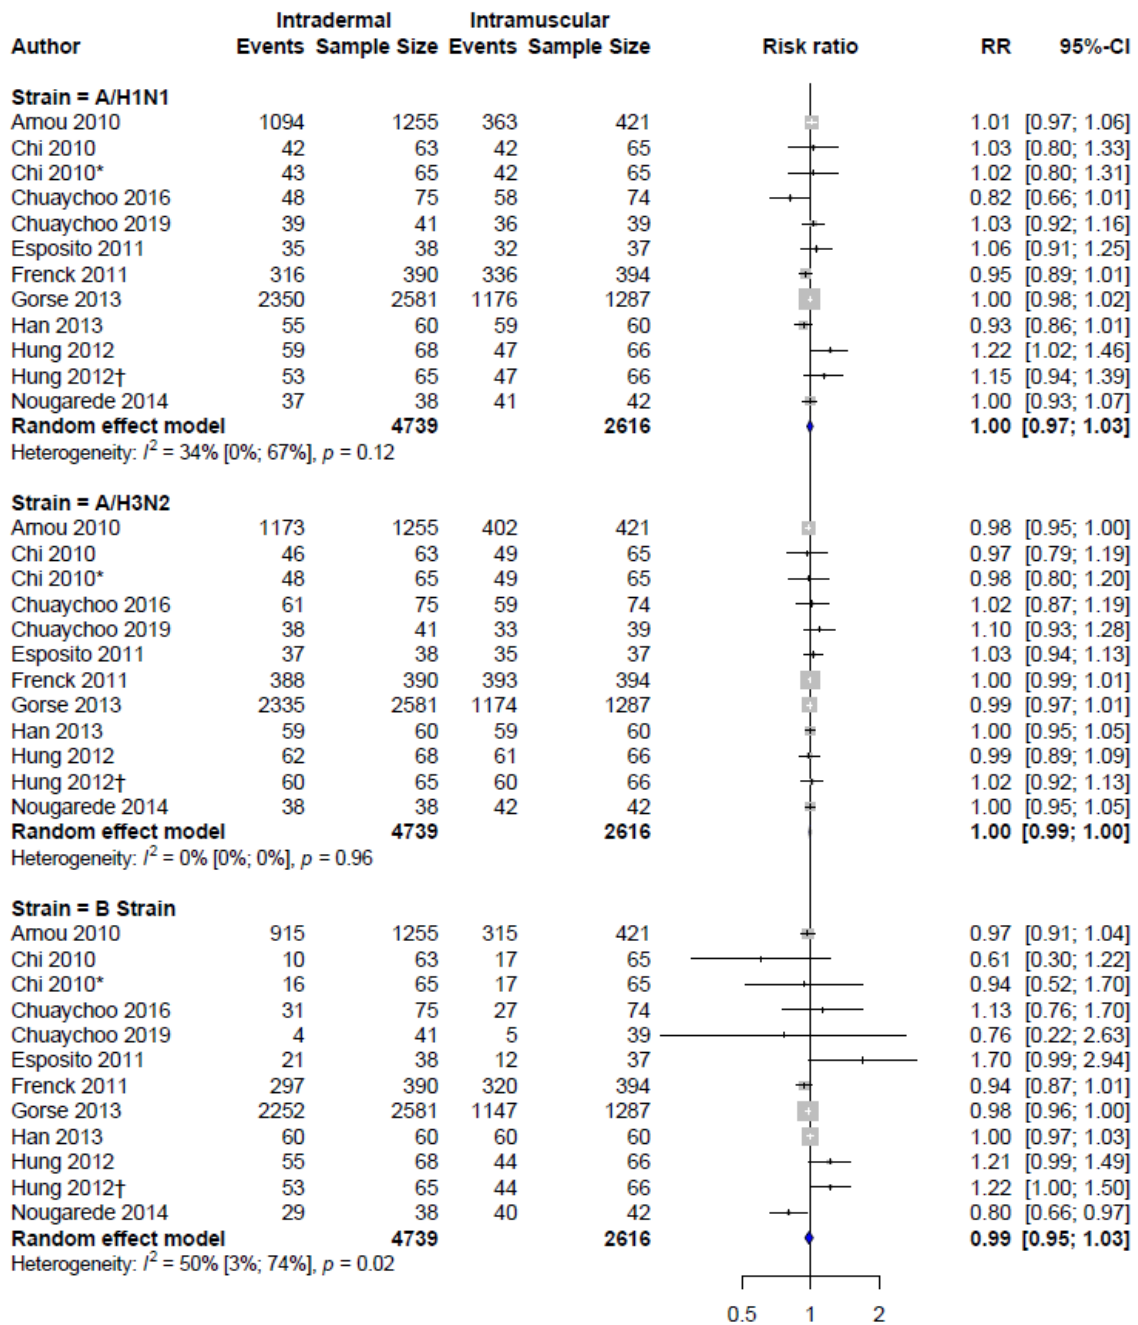

**eFigure 13. Seroprotection Older Adults: 9 µg ID vs 15 µg IM  
 † Two Injections**

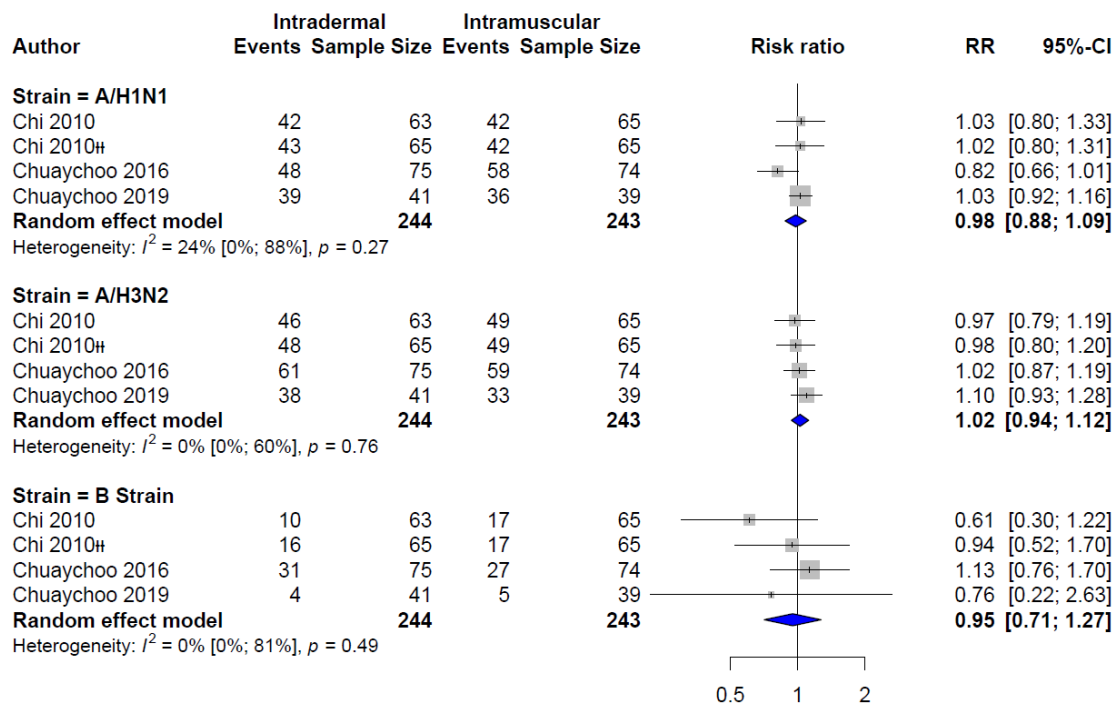

**eFigure 14.** Seroprotection: 15 µg ID vs 15 µg IM  
 (\*Inflexa vs Inflexa, \*\* Intanza vs Inflexa, †Inflexa vs Fluad, ‡Intanza vs Fluad, † Adjuvanted)

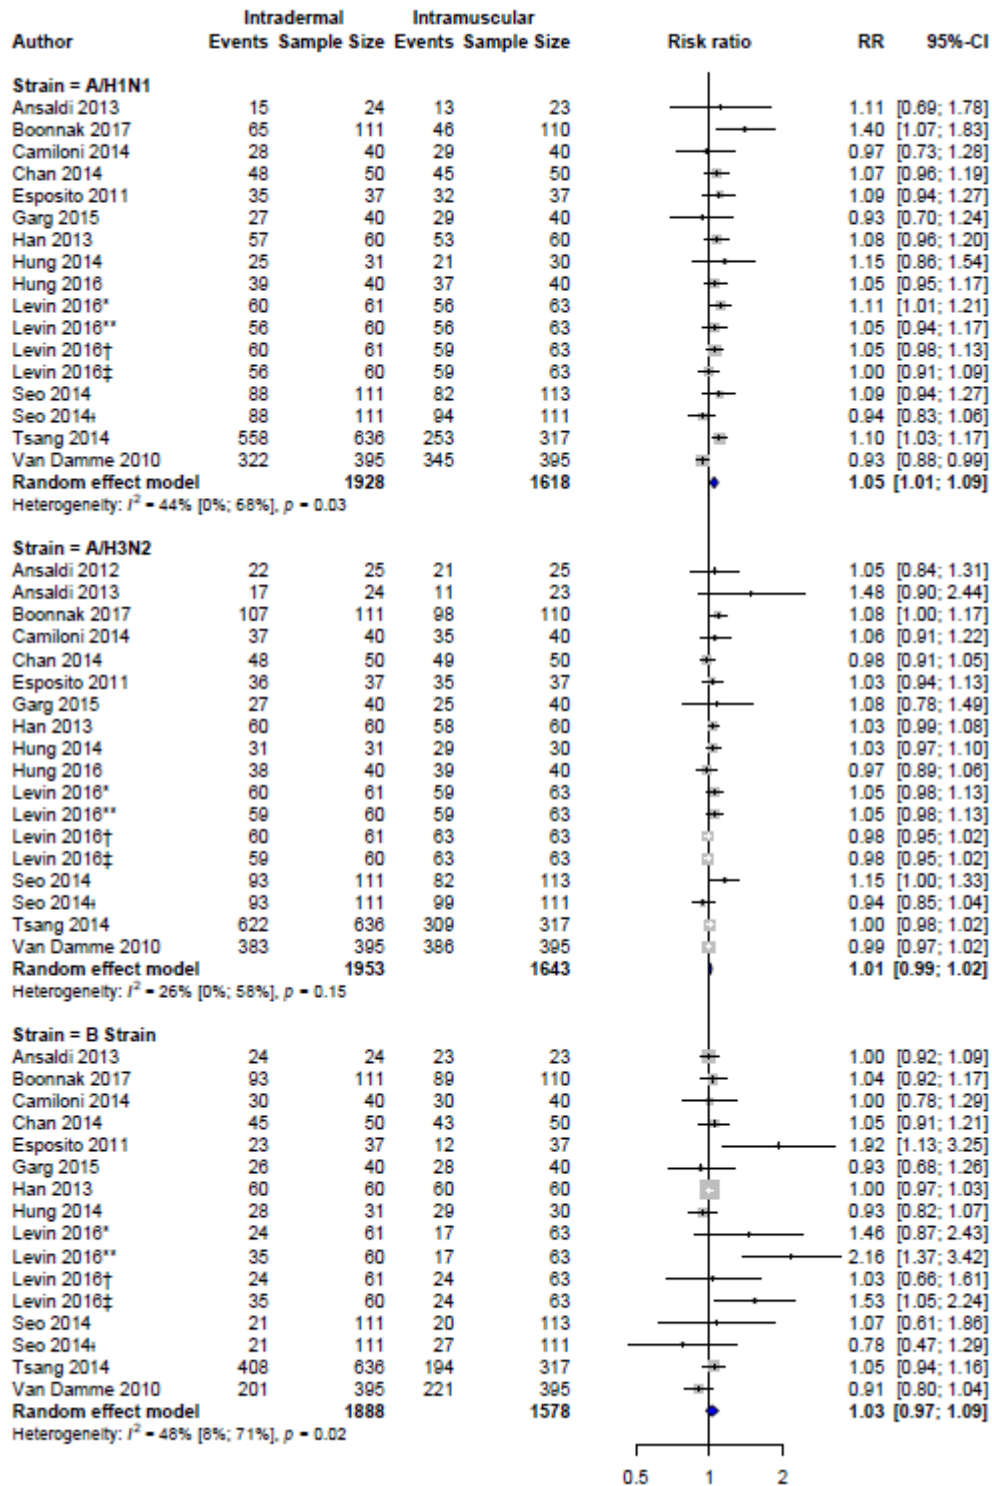

**eFigure 15.** Seroprotection in Older Adults: 15 µg ID vs 15 µg IM  
 (\*Inflexa vs Inflexa, \*\* Intanza vs Inflexa, †Inflexa vs Fluad, ‡Intanza vs Fluad, † Adjuvanted)

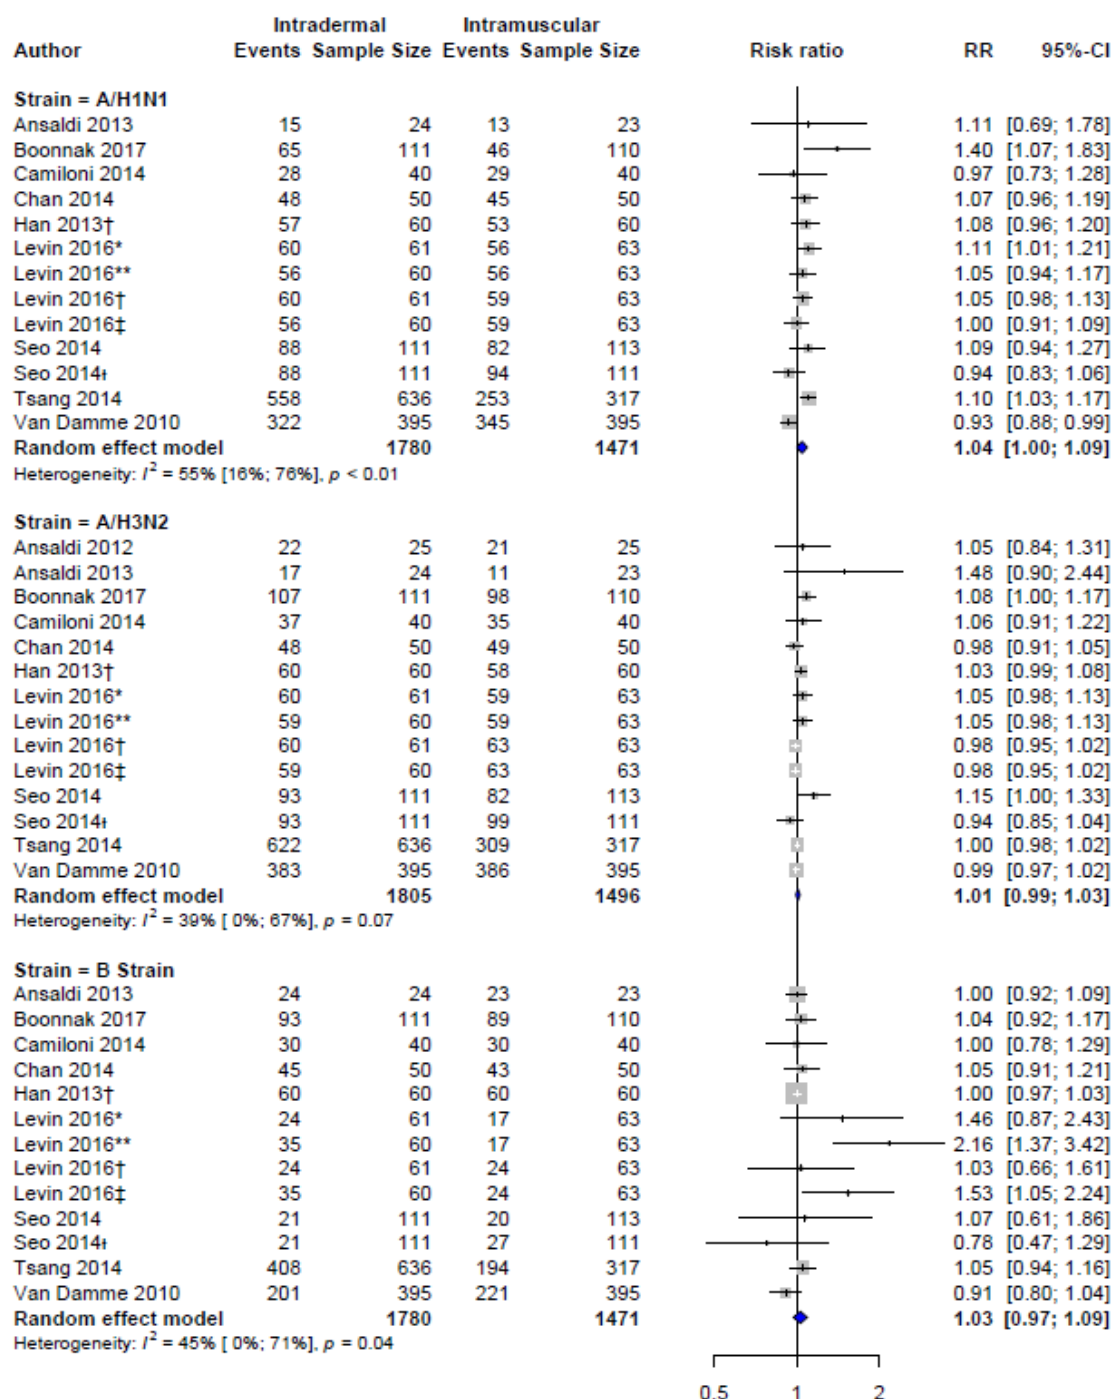

**eFigure 16.** GMT: 3 µg ID vs 15 µg IM

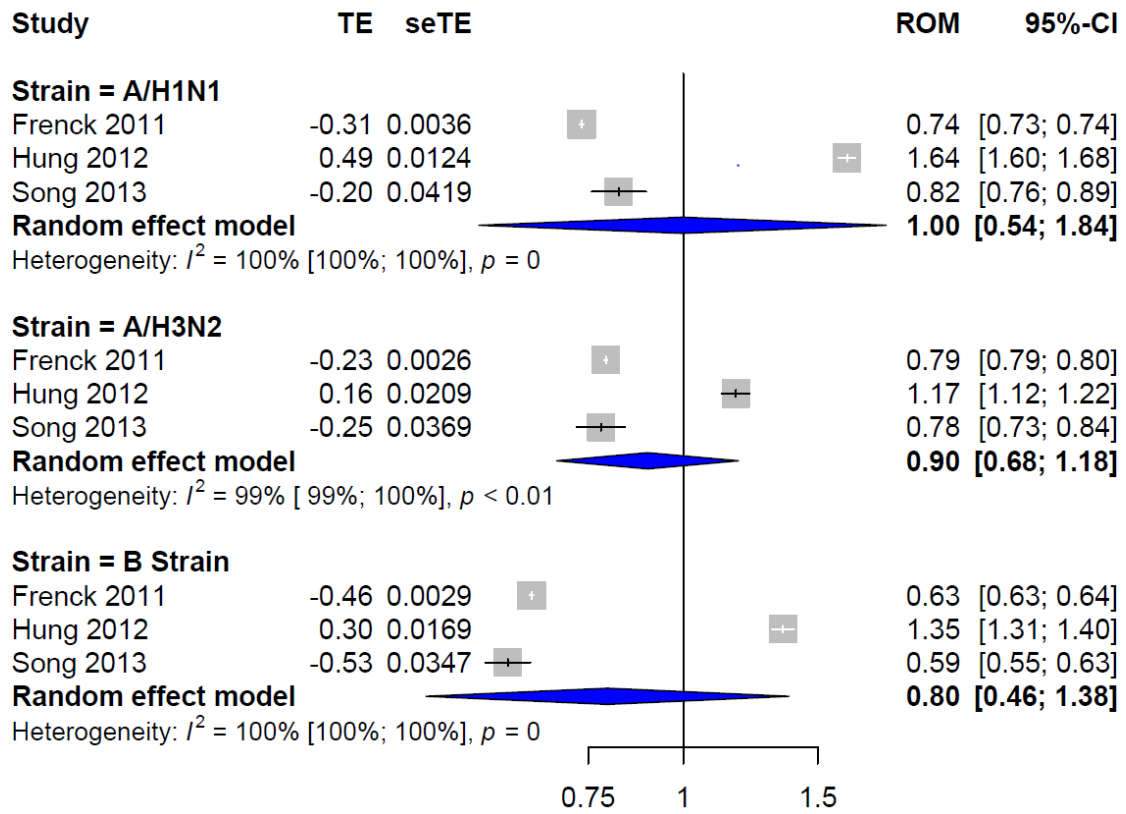

**eFigure 17.** GMT: 6 µg ID vs 15 µg IM

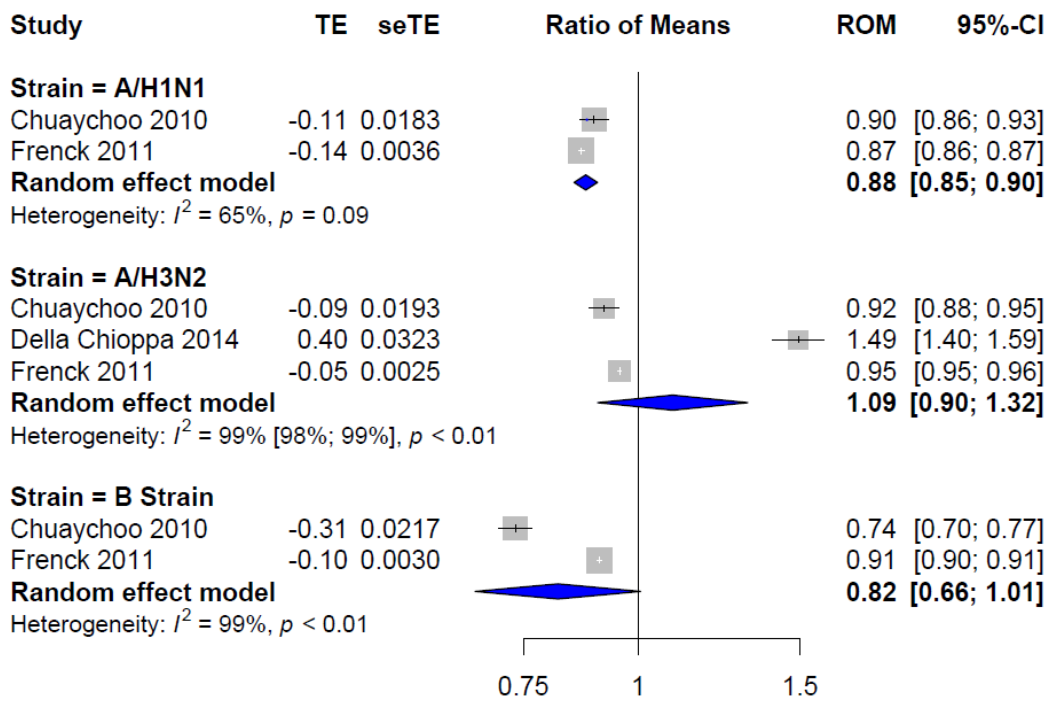

**eFigure 18.** GMT: 9 µg ID vs 15 µg IM  
 (\* Two Doses, †Soluvia Device)

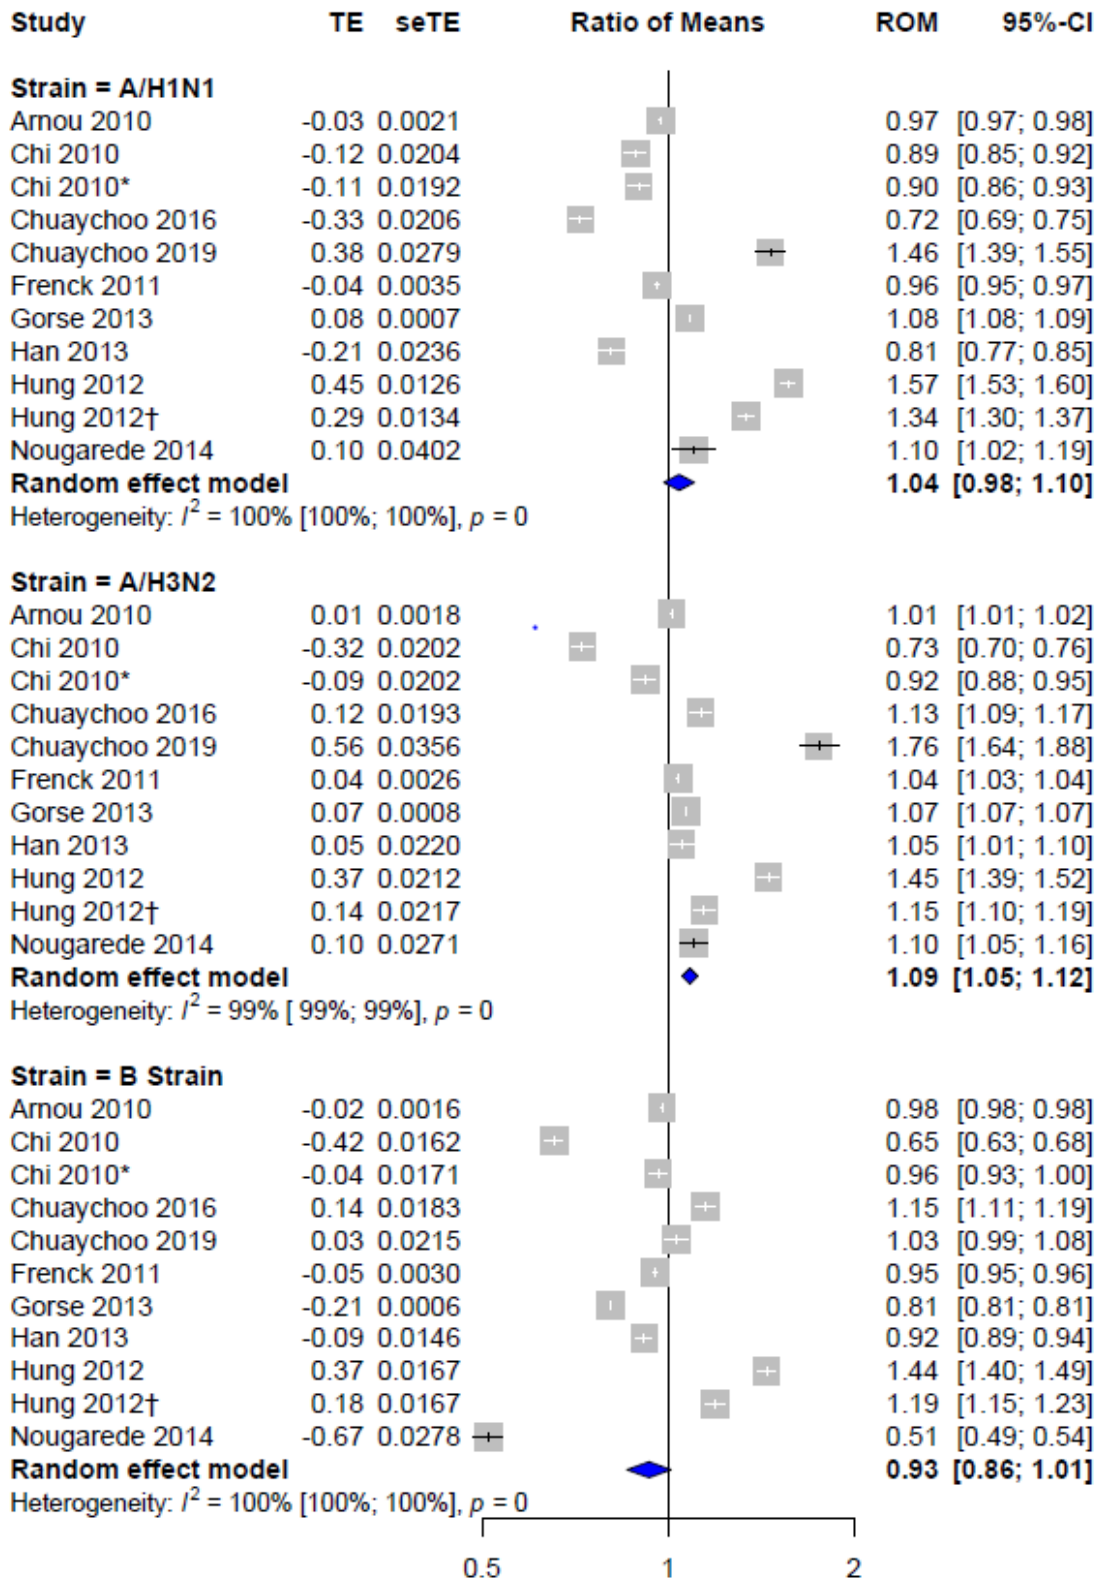



**eFigure 19.** GMT: in Older Adults 9 µg ID vs 15 µg IM

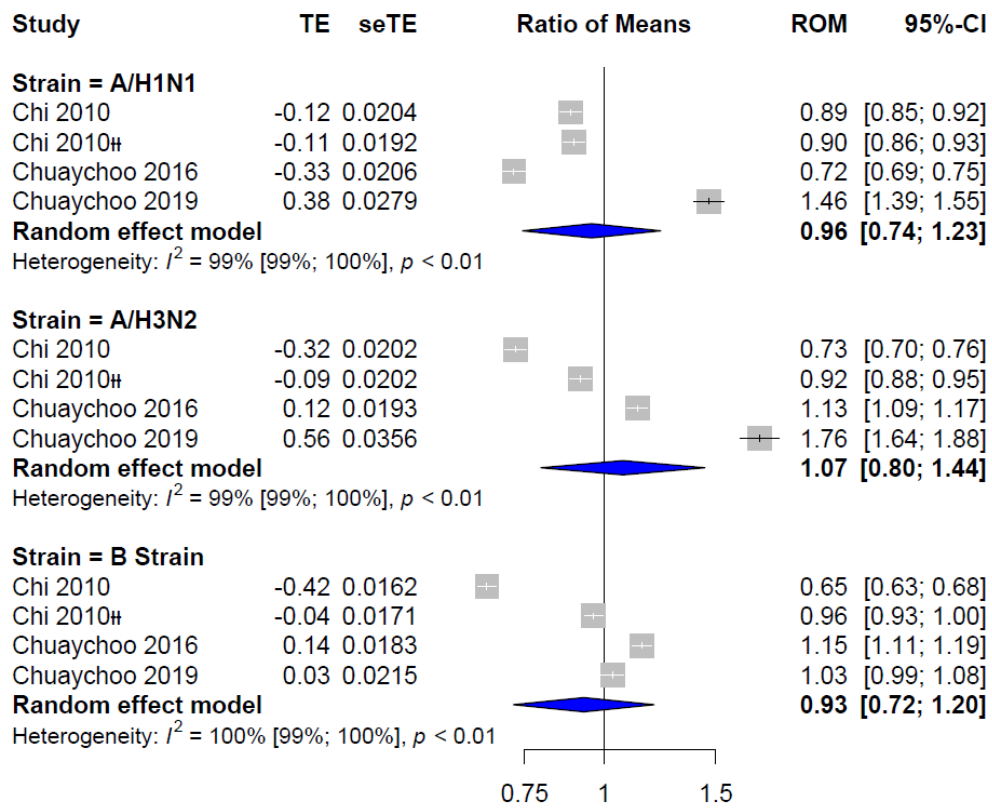



**eFigure 20.** GMT: 15 µg ID vs 15 µg IM

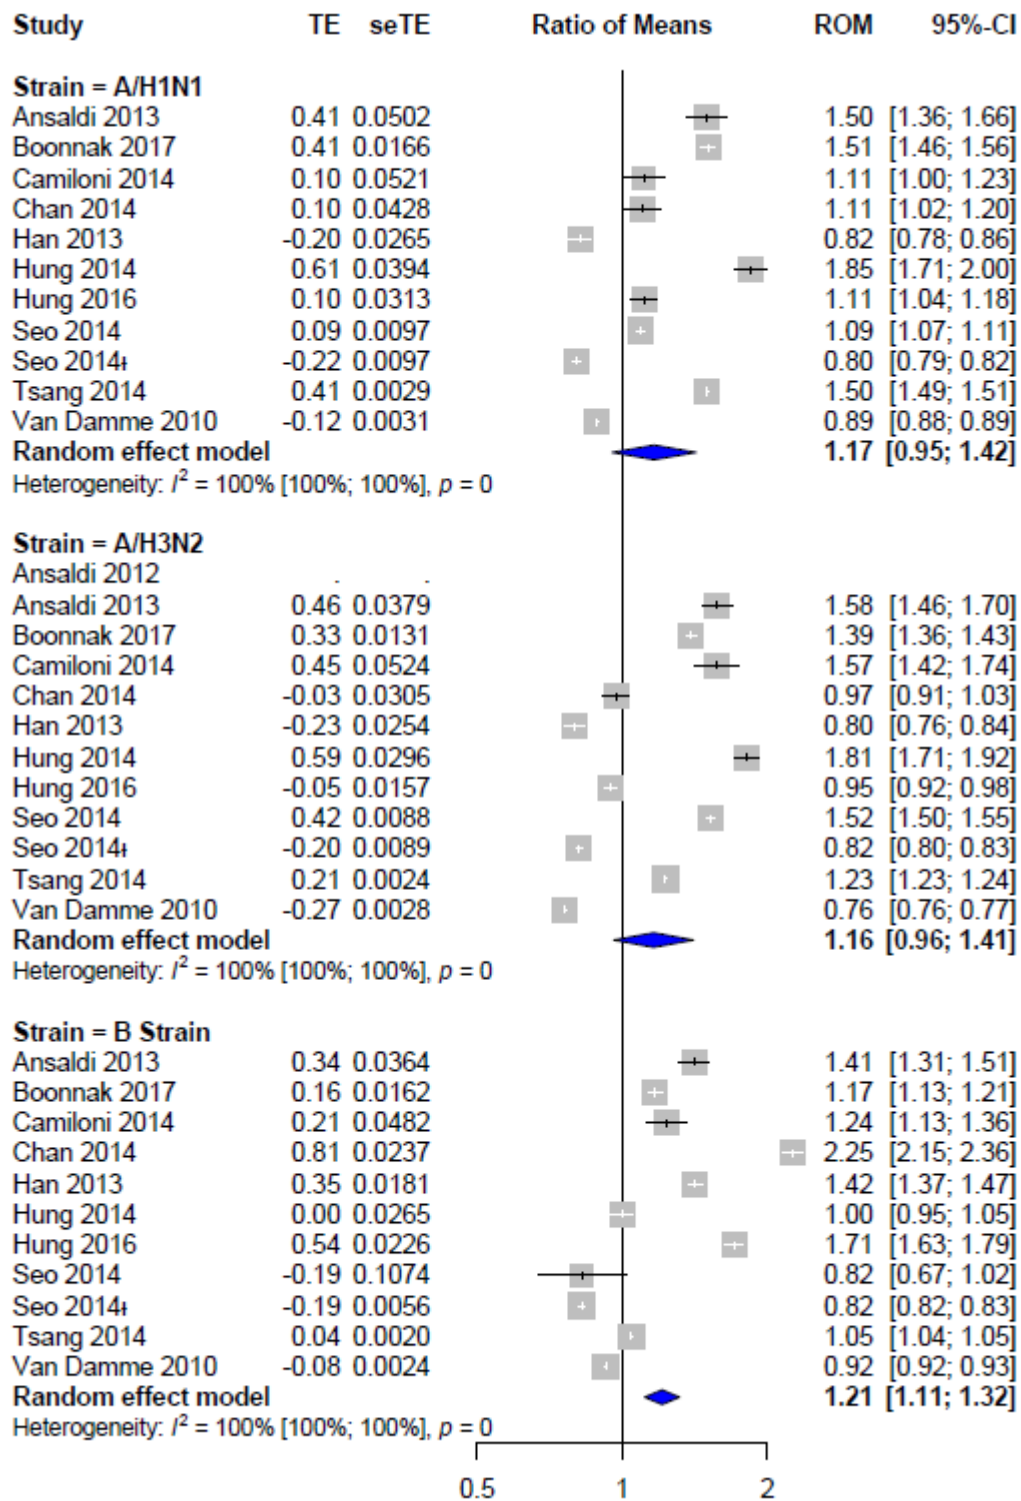

**eFigure 21.** GMT in Older Adults: 15 µg ID vs 15 µg IM (‡ Adjuvanted, †≥60 Years Old)

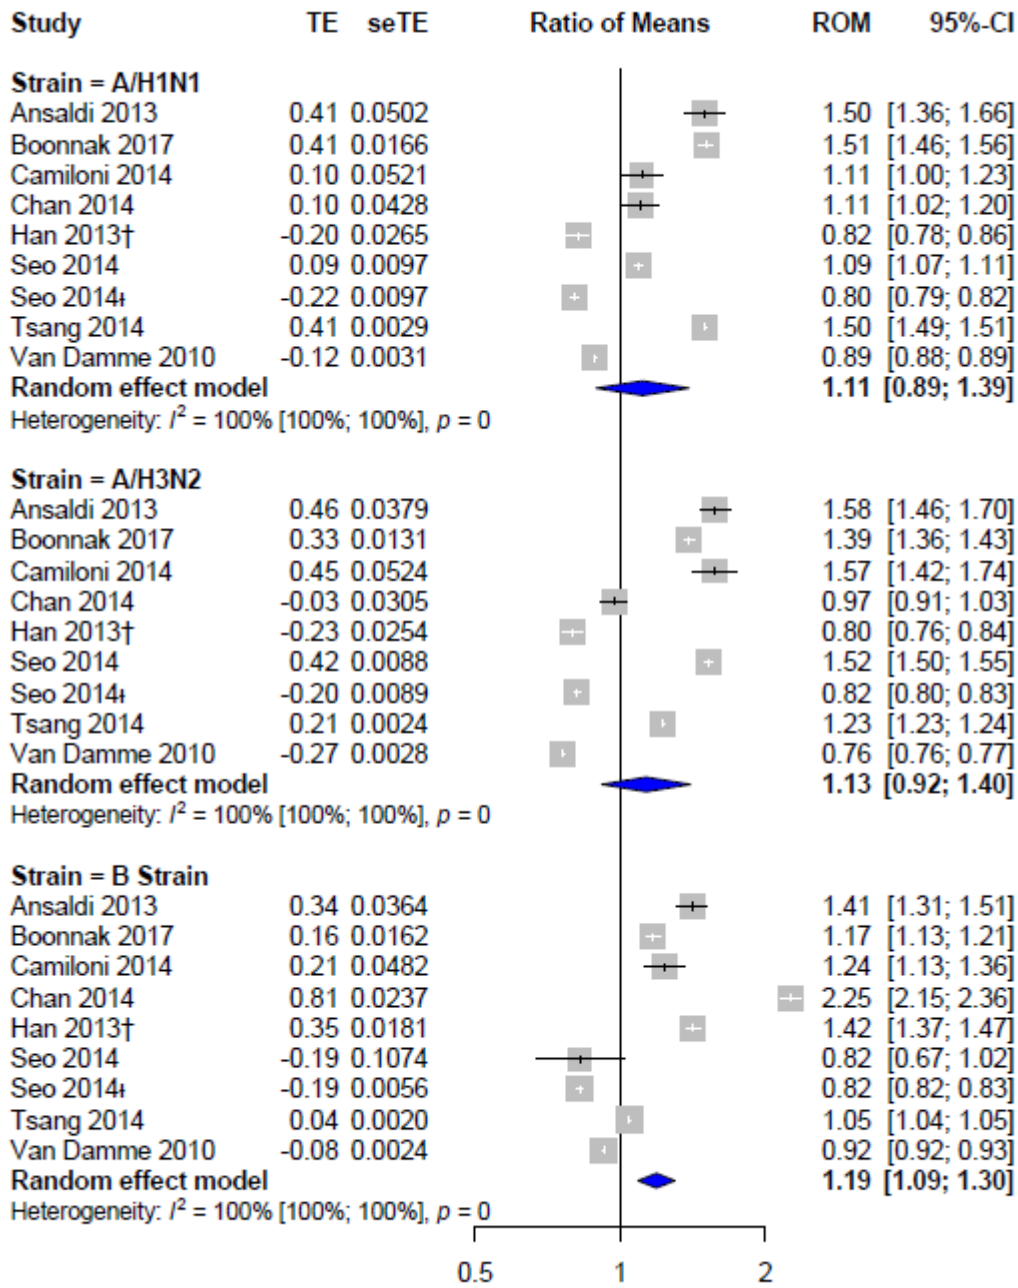

**eFigure 22.** Local Adverse Events: 3 µg ID vs 15 µg IM

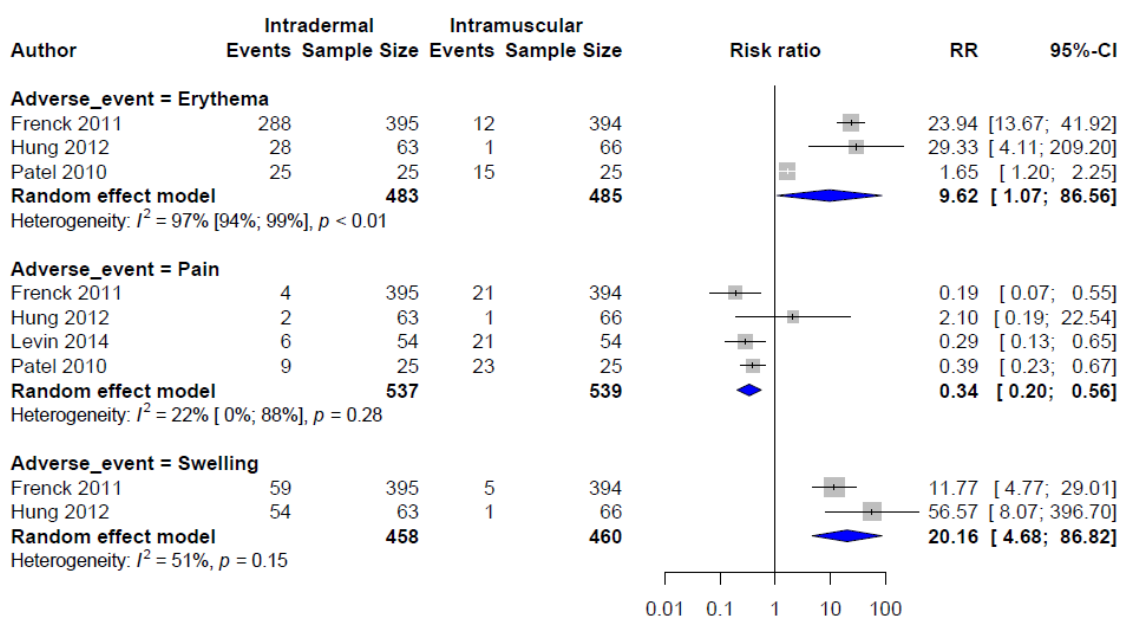

**eFigure 23.** Local Adverse Events: 6 µg ID vs 15 µg IM

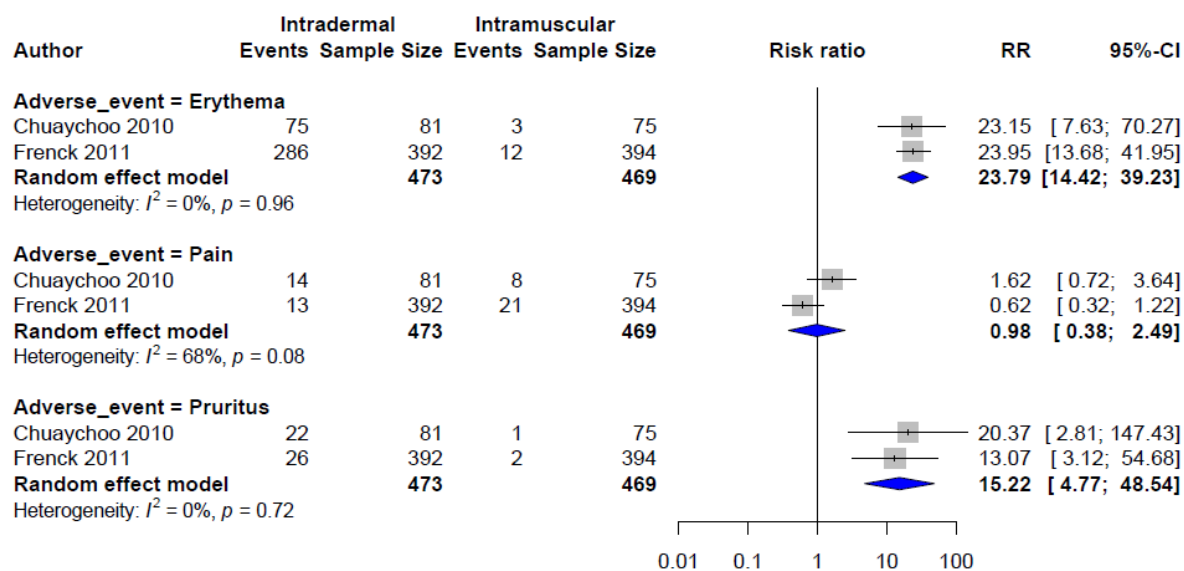

**eFigure 24.** Local Adverse Events: 9 µg ID vs 15 µg IM (††Two Doses, ‡Soluvia Device)

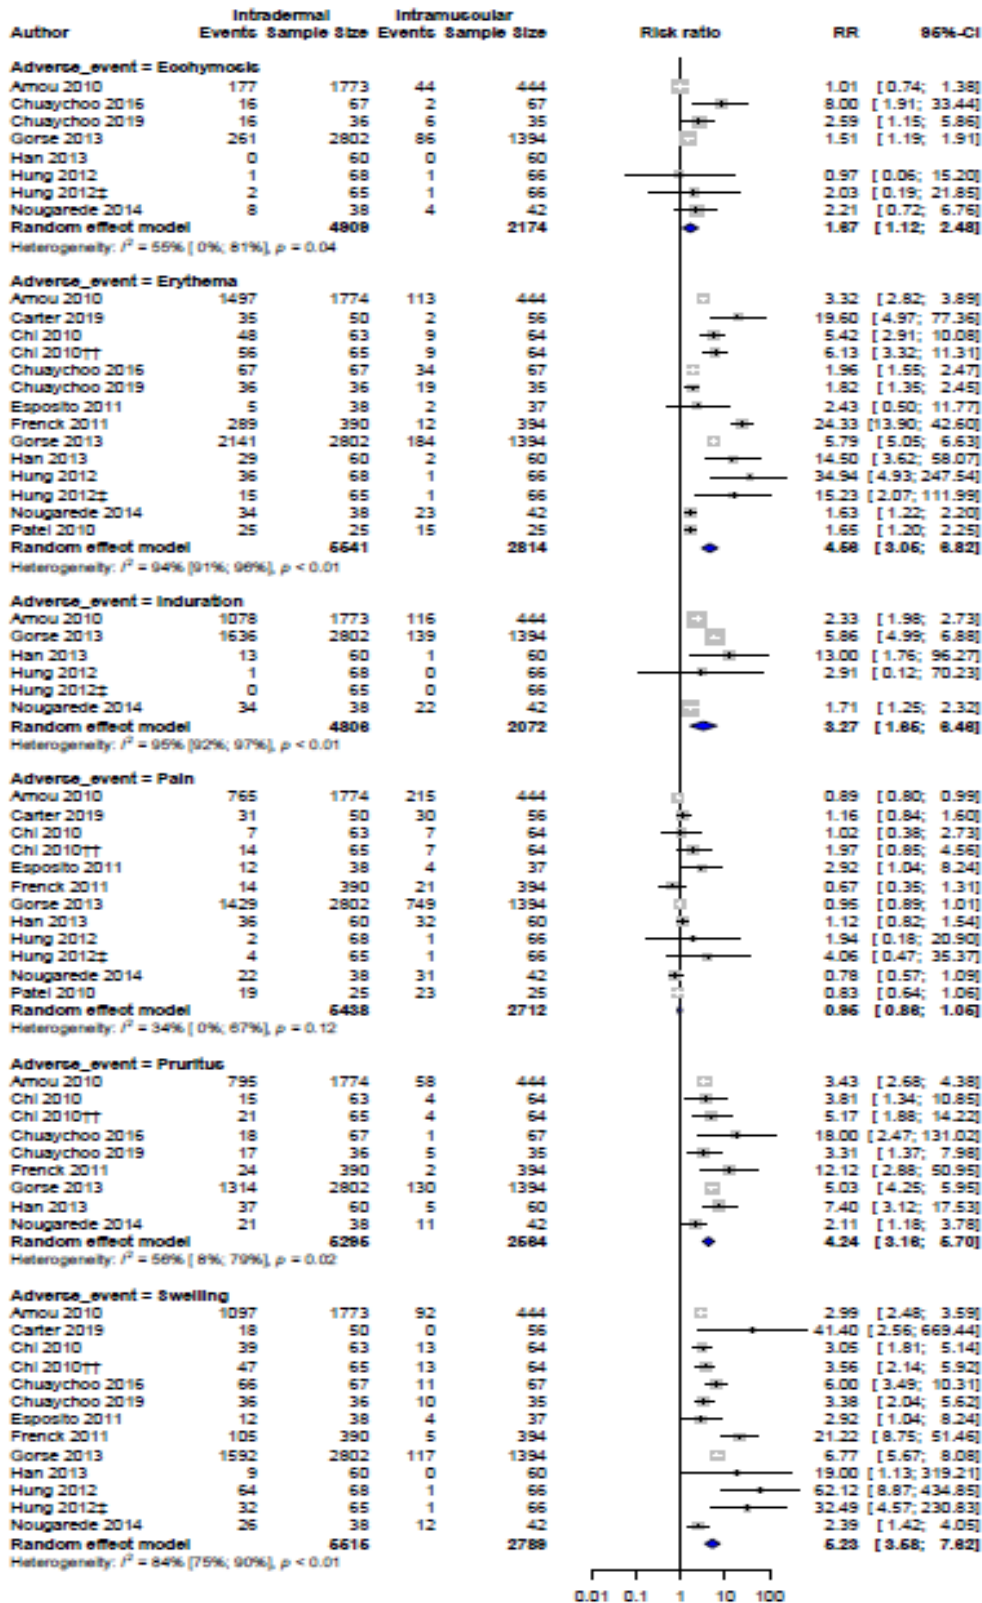

**eFigure 25.** Local Adverse Events: 15 µg ID vs 15 µg IM  
 (\*Inflexa vs Inflexa, \*\* Intanza vs Inflexa, †Inflexa vs Fluad, ‡Intanza vs Fluad, † Adjuvanted)

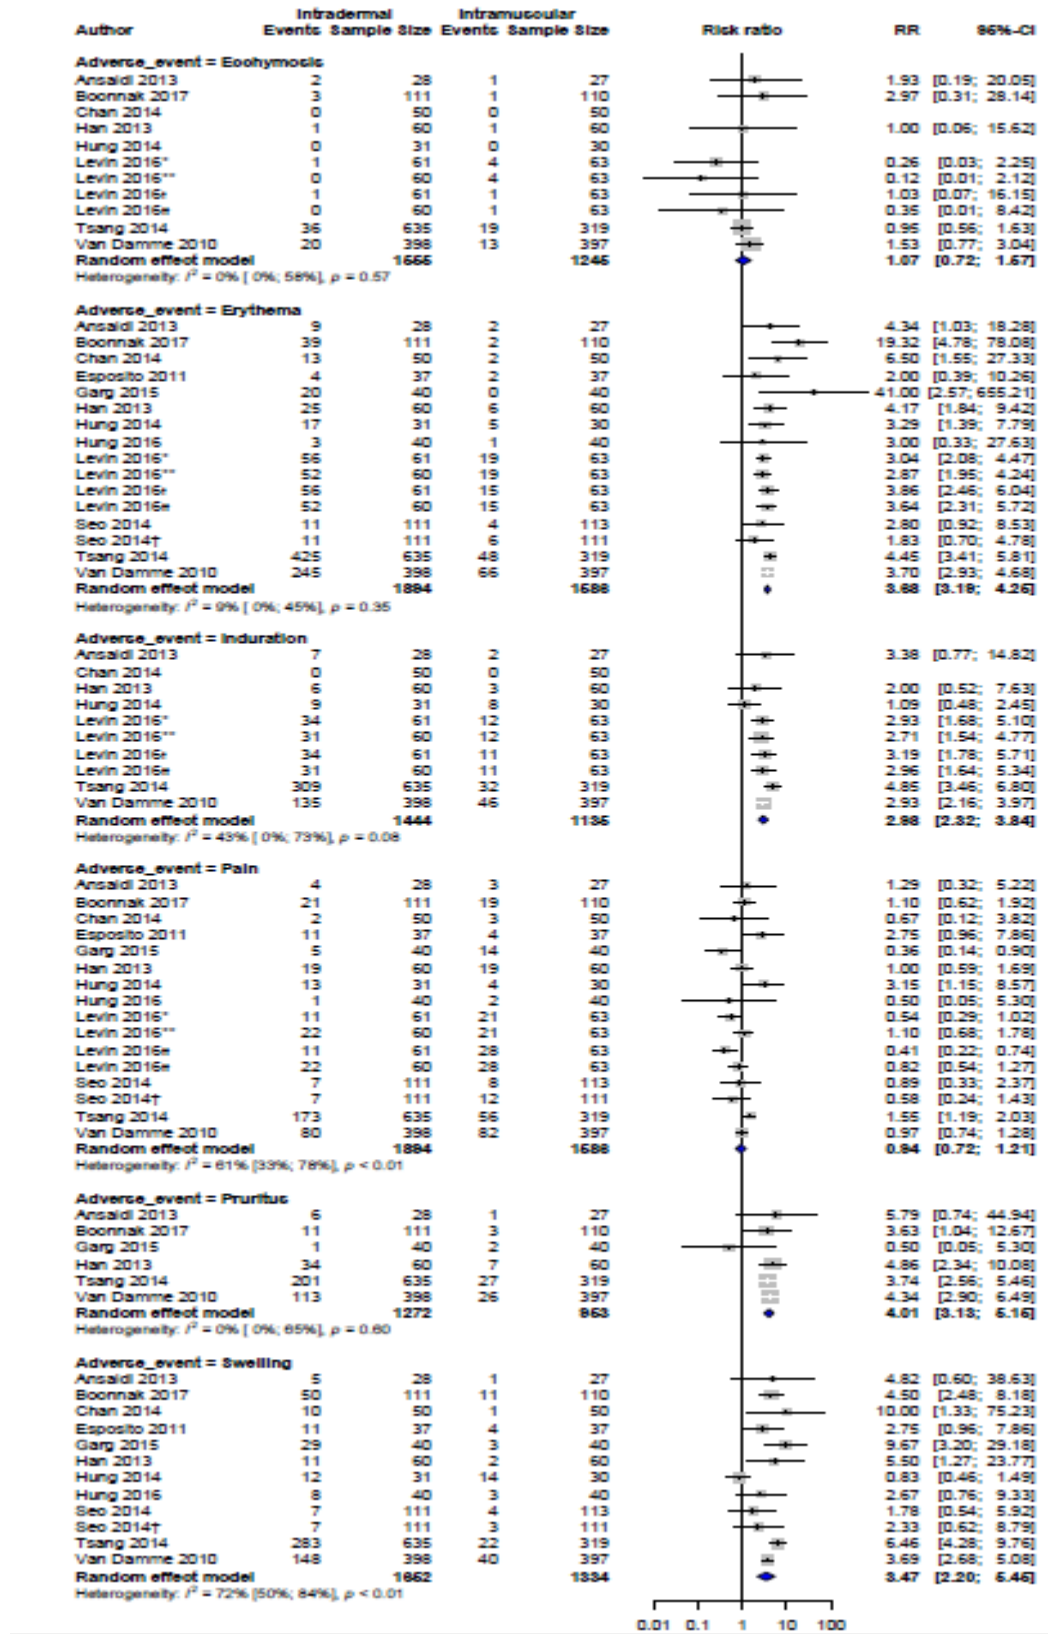

**eFigure 26. Systemic Adverse Events: 3 µg ID vs 15 µg IM**

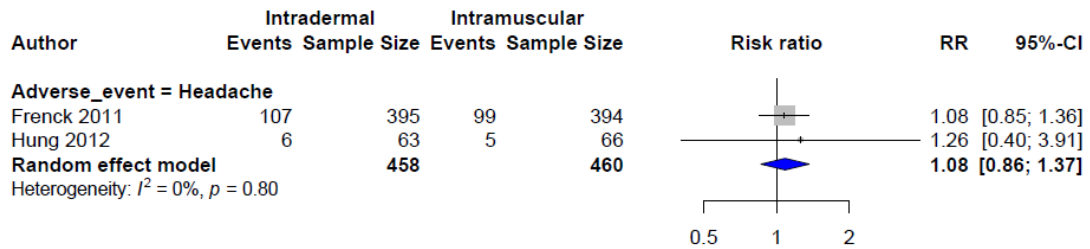

**eFigure 27. Systemic Adverse Events: 6 µg ID vs 15 µg IM**

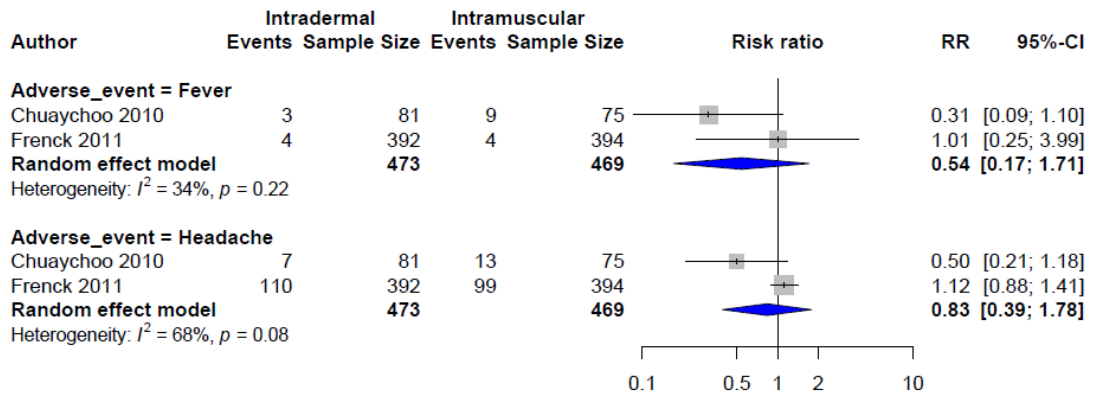



**eFigure 28.** Systemic Adverse Events: 9 µg ID vs 15 µg IM (‡ Soluvia, †† Two Doses)

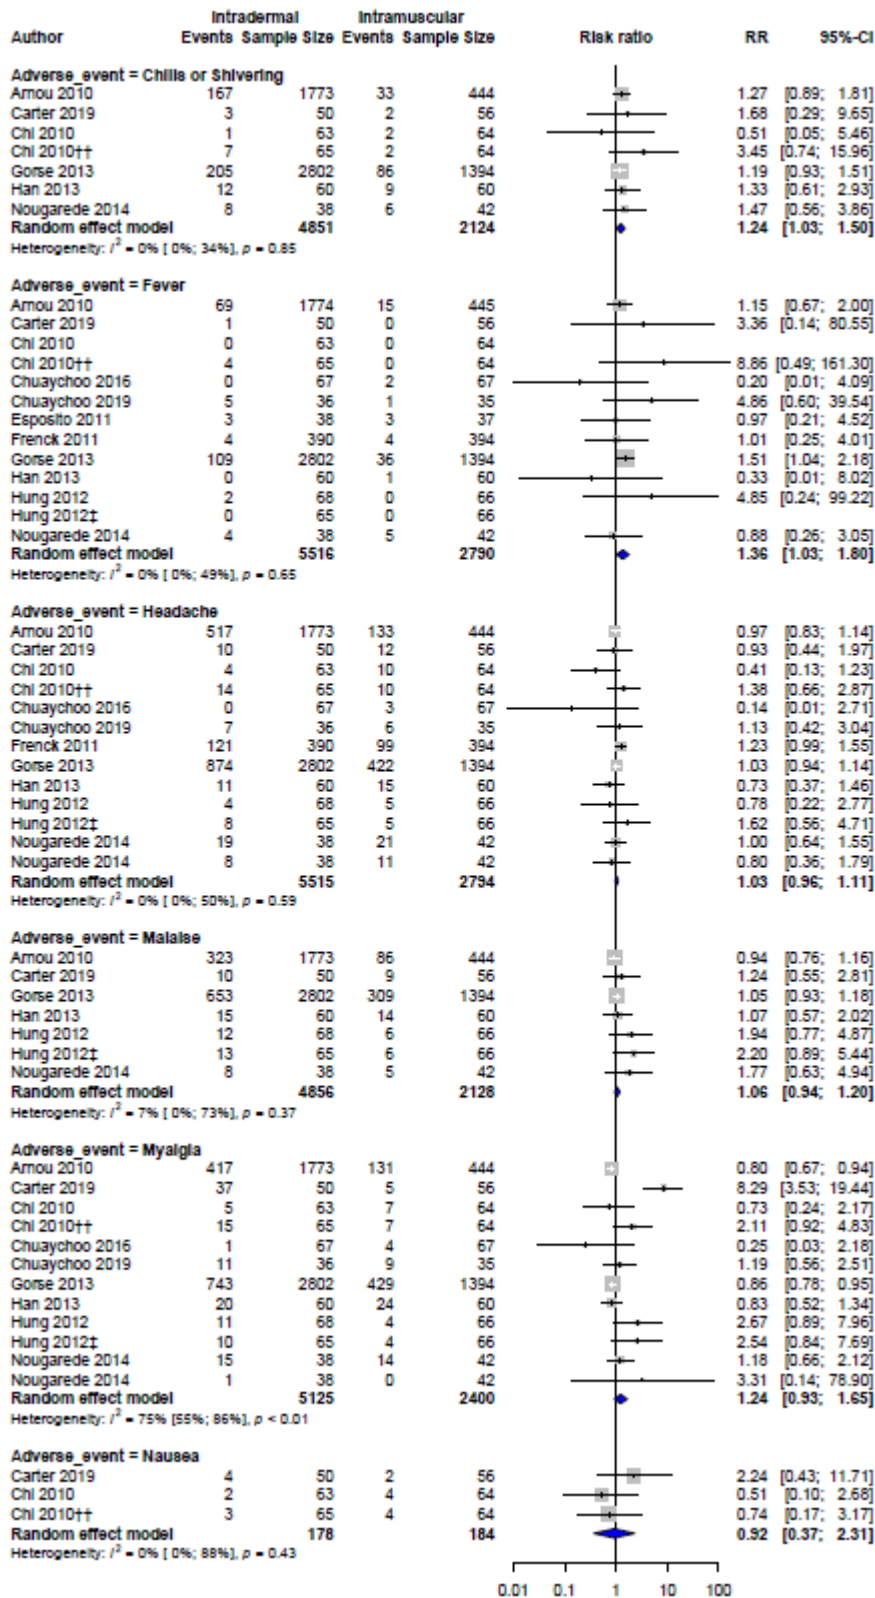

**eFigure 29.** Systemic Adverse Events: 15 µg ID vs 15 µg IM  
 (\*Inflexa vs Inflexa, \*\* Intanza vs Inflexa, †Inflexa vs Fluad, ‡Intanza vs Fluad, † Adjuvanted)

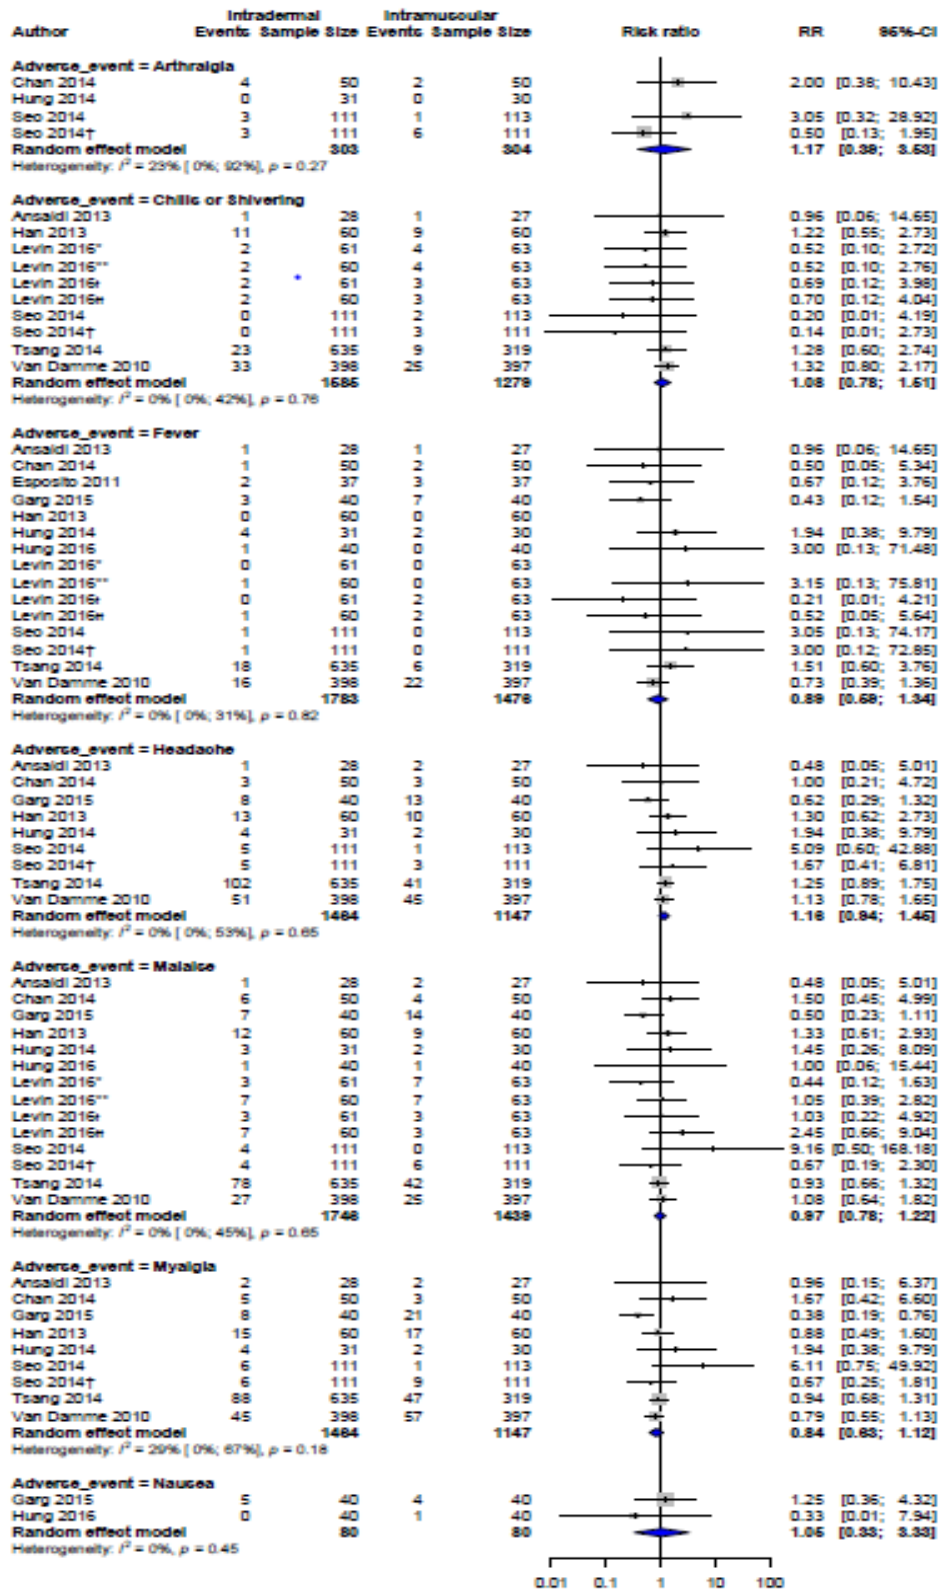



**eFigure 30.** Funnel Plot of Seroconversion: 9 µg ID vs 15 µg IM

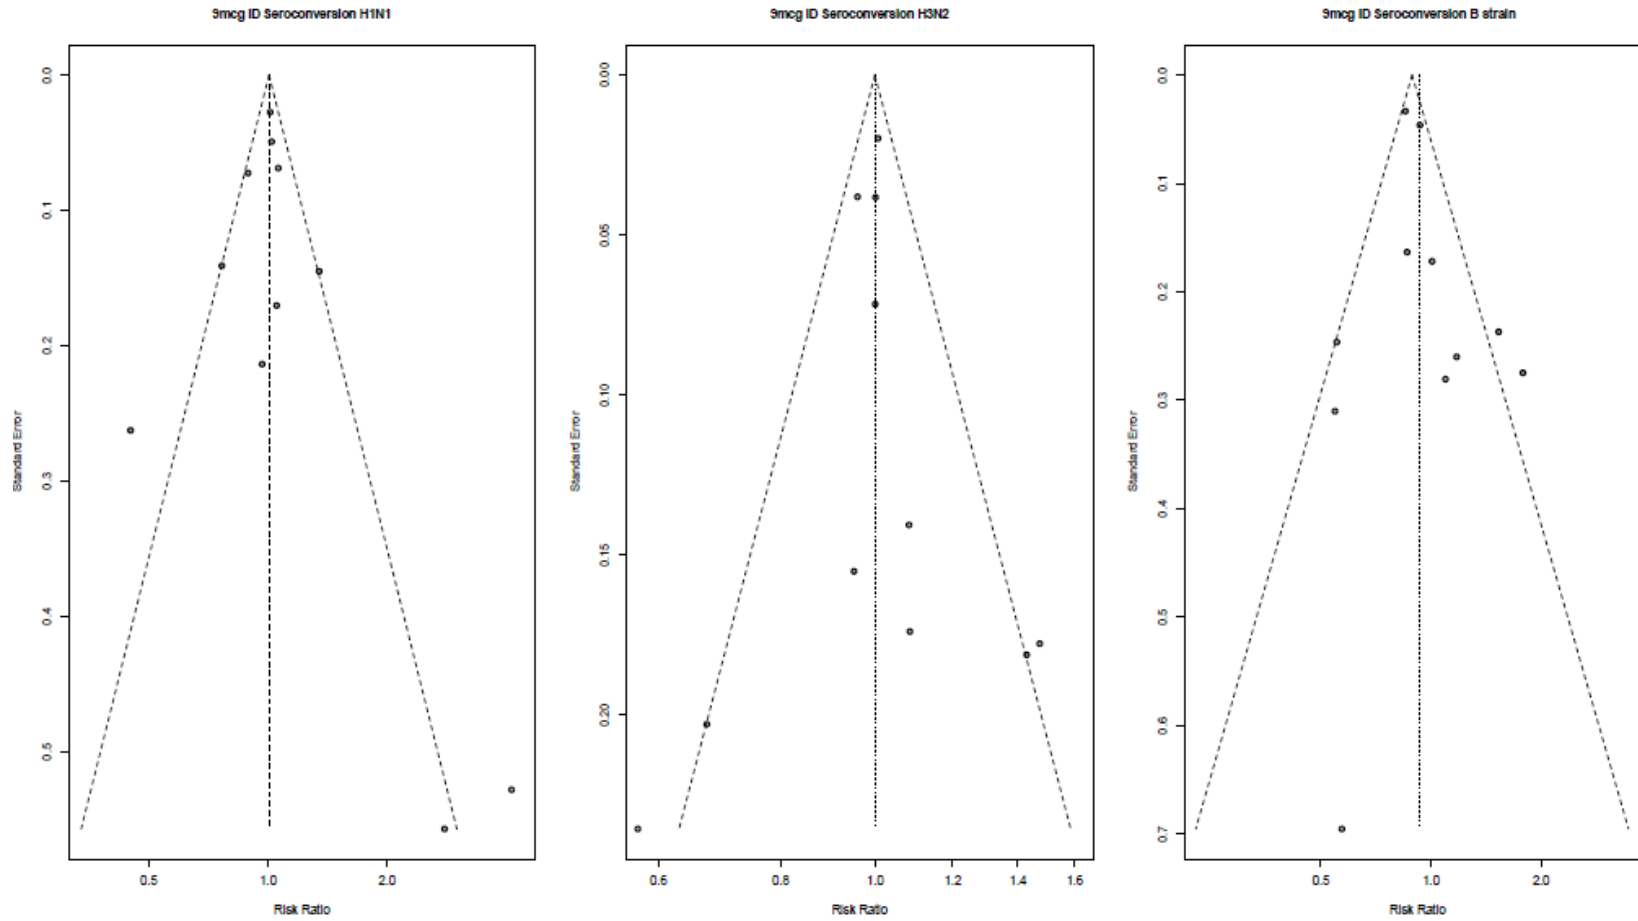

**eFigure 31.** Funnel Plot of Seroprotection: 9 µg vs 15 µg

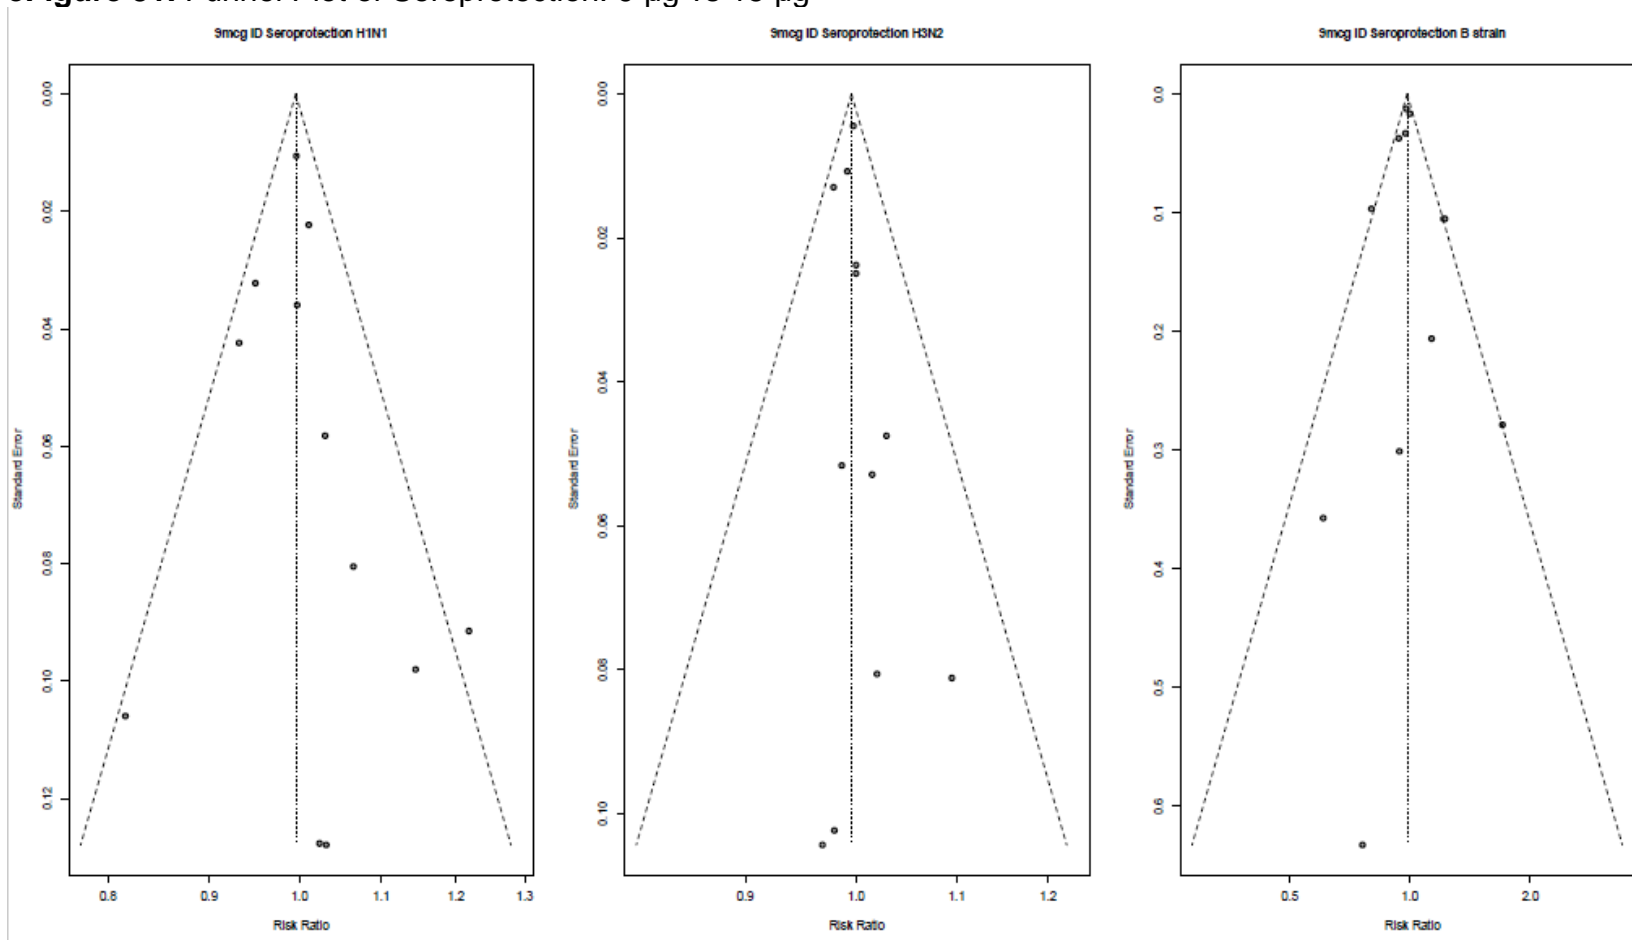

**eFigure 32.** Funnel Plot of GMT: 9  $\mu\text{g}$  ID vs 15  $\mu\text{g}$  IM

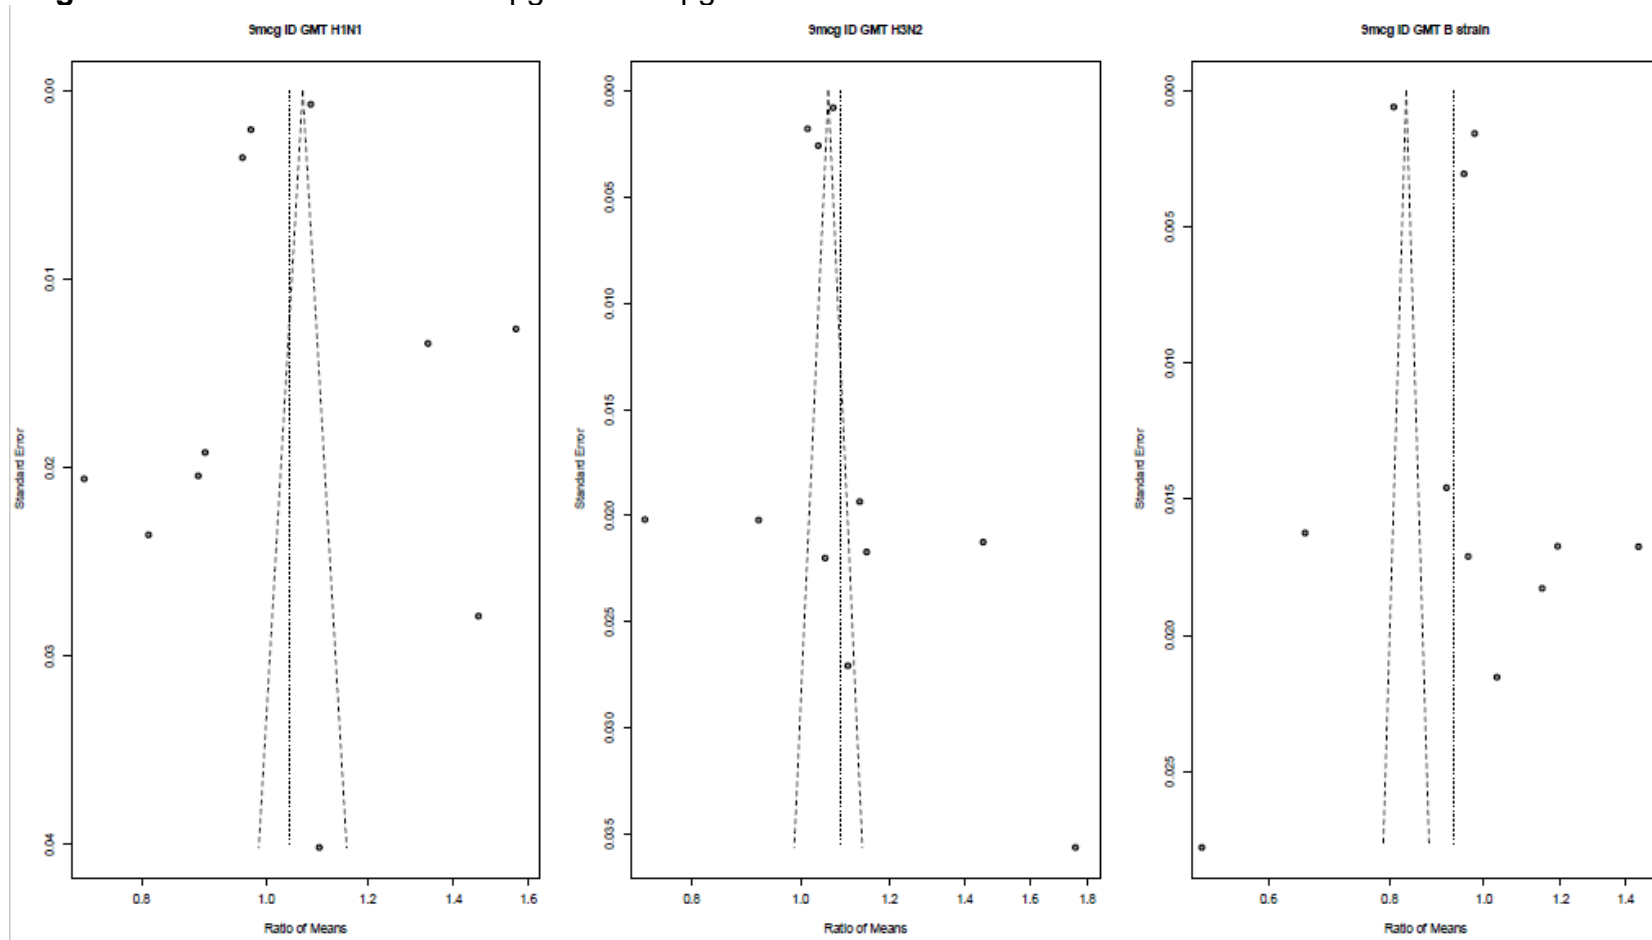

**eFigure 33.** Funnel Plot of Seroconversion: 15 µg ID vs 15 µg IM

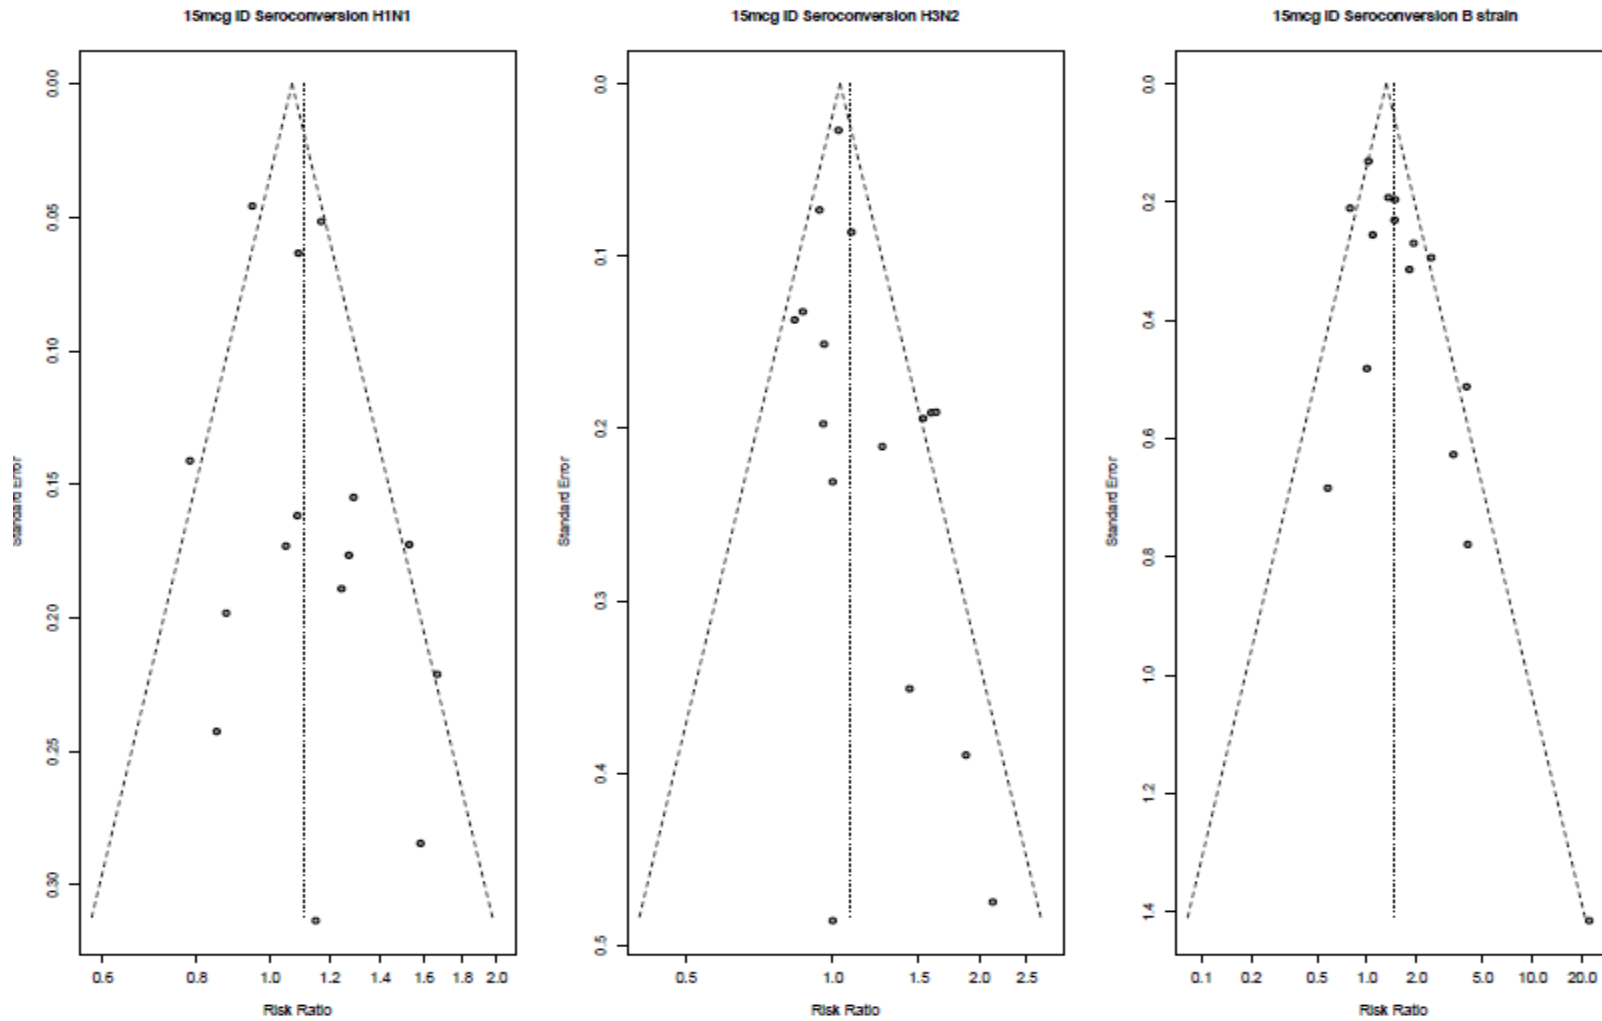

**eFigure 34.** Funnel Plot of Seroprotection: 15 µg ID vs 15 µg IM

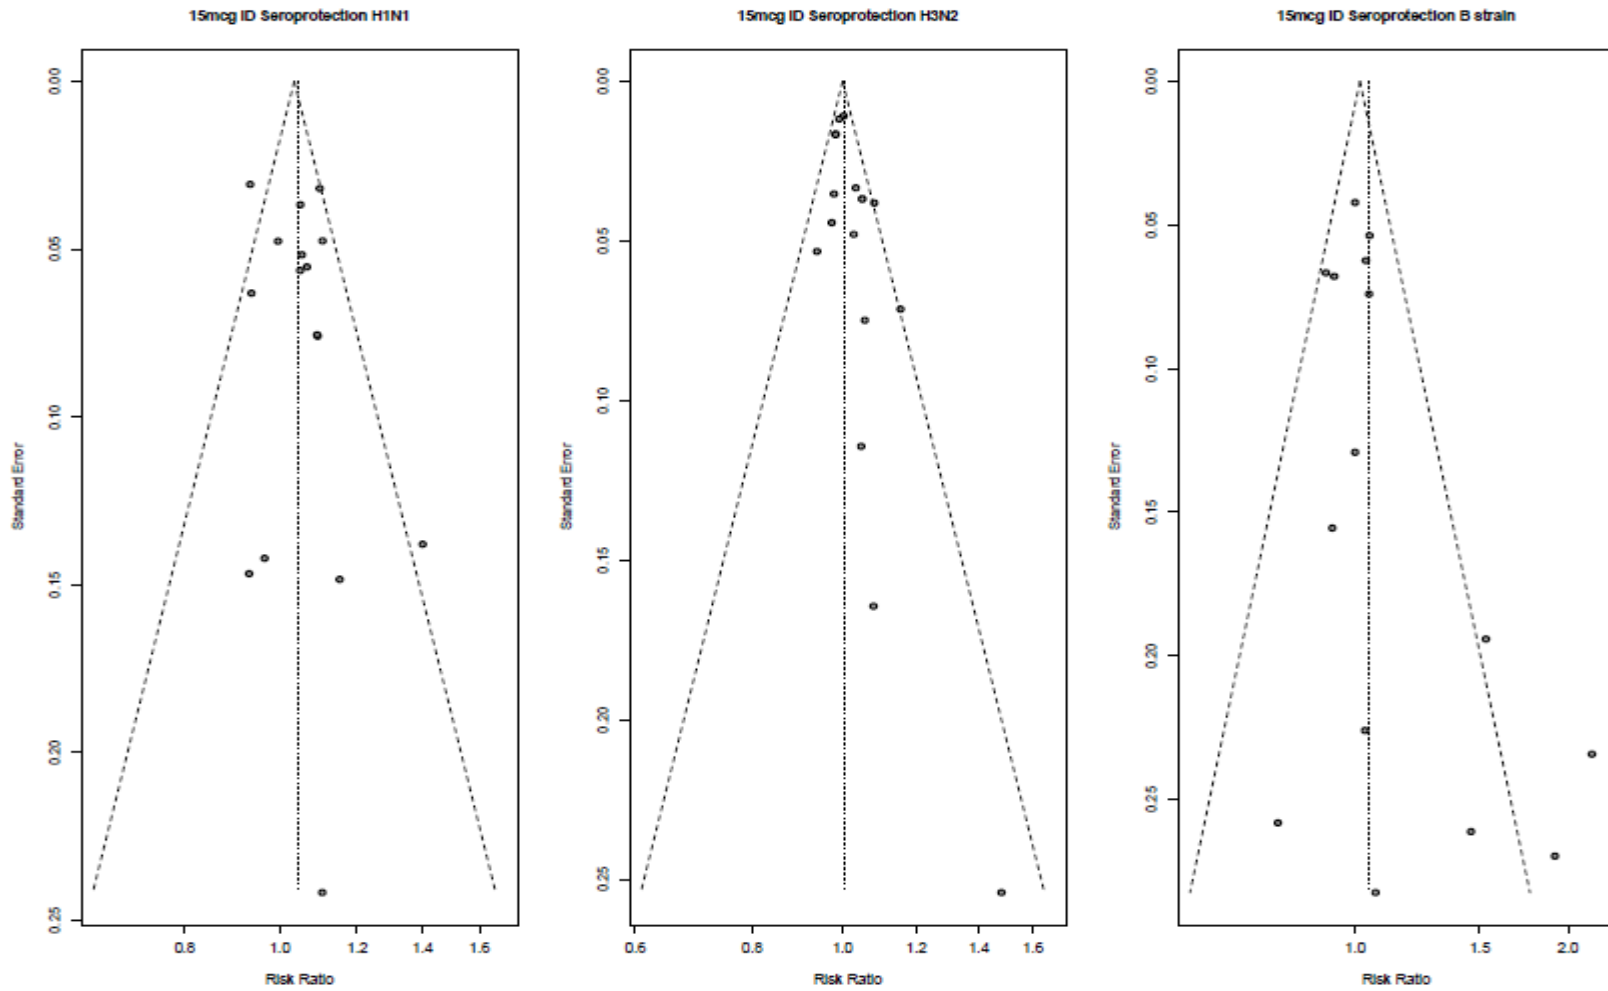

**eFigure 35.** Funnel Plot of GMT: 15 µg ID vs 15 µg IM

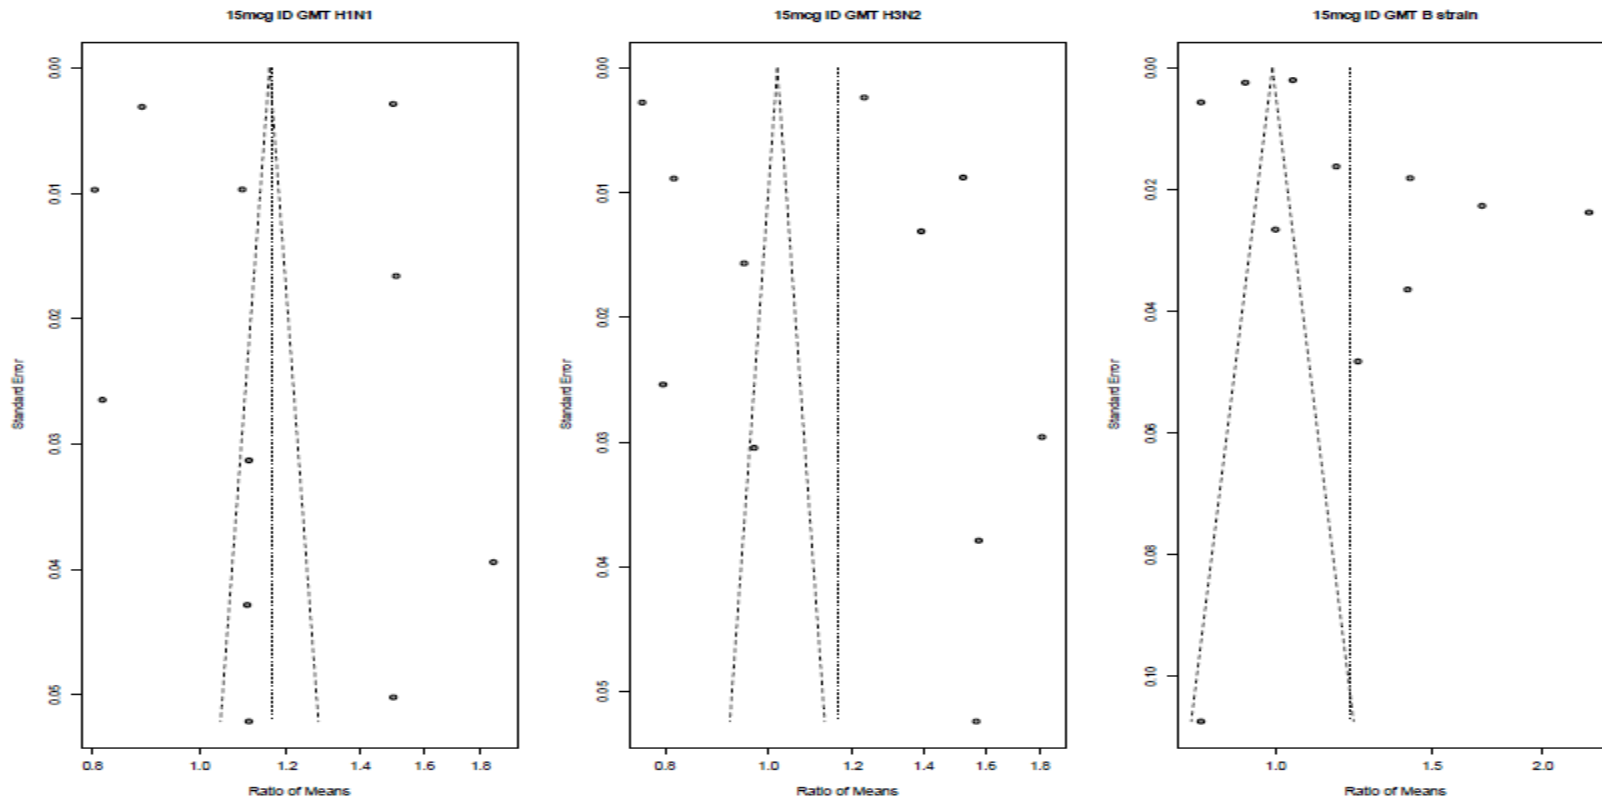

Supplement: jamanetwopen-e2035693-s001.pdf [file jamanetwopen-e2035693-s001.pdf]
